# Supplementary material for: The EDC3 chronology for the EPICA Dome C ice core
Source: Copernicus journal article supplement (doi:10.5194/cp-3-485-2007), 2007-08-17
Supplement: Supplementary file 1 [file supplement_1.xls]

## Sheet: main
F. Parrenin, 14/05/2007.
The EDC3 time scale for EDC.
column 1:	Bag number. It refers to the EDC96 bag numbers above 789 m depth and to the EDC99 bag numbers below 789 m depth.
column 2:	Official logging depth for the top of the bag. It refers to the EDC96 depths above 787.05 m depth and to the EDC99 depths below 787.6 m depth.
column 3:	Equivalent EDC99 depth for the top 789 m.
column 4:	EDC3 time scale for the ice in yr before 1950 AD (b1950).
Note: There is a small 60 years compression in the EDC99 age scale at the transition from EDC96 to EDC99.
If you are looking in details at this depth, we recommend adding 60 years to the EDC99 ages below 789 m depth.
Note2: If you are looking for gas ages, have a look at the Loulergue et al. paper in the same CP's issue.
#bagEDC96+99	logdepthtop-EDC96+99	logdepthtop-EDC99	ageEDC3-top-b1950
1	0		-50
2	0.55		-43.5477
3	1.1		-37.4183
4	1.65		-31.6115
5	2.2		-24.5139
6	2.75		-17.7378
7	3.3		-10.9595
8	3.85		-3.20879
9	4.4		5.48176
10	4.95		13.5204
11	5.5		22.2163
12	6.05		30.6081
13	6.6		38.3738
14	7.15		46.812
15	7.7		55.0562
16	8.25		64.4151
17	8.8		73.1508
18	9.35		81.9324
19	9.9		90.7593
20	10.45		99.9703
21	11		109.889
22	11.55		119.259
23	12.1		129.404
24	12.65	12.46	139.939
25	13.2	13.01	150.102
26	13.75	13.56	160.58
27	14.3	14.11	171.018
28	14.85	14.66	181.445
29	15.4	15.21	191.483
30	15.95	15.76	201.872
31	16.5	16.31	212.186
32	17.05	16.86	223.163
33	17.6	17.41	233.739
34	18.15	17.96	244.641
35	18.7	18.51	255.5
36	19.25	19.06	266.612
37	19.8	19.61	277.771
38	20.35	20.16	289.25
39	20.9	20.71	301.043
40	21.45	21.26	312.442
41	22	21.81	323.855
42	22.55	22.36	335.578
43	23.1	22.91	346.881
44	23.65	23.46	358.508
45	24.2	24.01	370.901
46	24.75	24.56	382.874
47	25.3	25.11	395.186
48	25.85	25.66	407.466
49	26.4	26.21	418.755
50	26.95	26.76	430.398
51	27.5	27.31	442.409
52	28.05	27.86	454.099
53	28.6	28.41	466.125
54	29.15	28.96	478.214
55	29.7	29.51	490.397
56	30.25	30.06	503.057
57	30.8	30.61	515.651
58	31.35	31.16	528.764
59	31.9	31.71	541.609
60	32.45	32.26	554.931
61	33	32.81	567.754
62	33.55	33.36	580.6
63	34.1	33.91	593.511
64	34.65	34.46	606.474
65	35.2	35.01	619.466
66	35.75	35.56	632.049
67	36.3	36.11	644.987
68	36.85	36.66	658.258
69	37.4	37.21	672.128
70	37.95	37.76	686.651
71	38.5	38.31	700.679
72	39.05	38.86	715.027
73	39.6	39.41	729.278
74	40.15	39.96	744.239
75	40.7	40.51	758.743
76	41.25	41.06	772.407
77	41.8	41.61	785.836
78	42.35	42.16	798.901
79	42.9	42.71	812.307
80	43.45	43.26	824.811
81	44	43.81	837.1
82	44.55	44.36	849.379
83	45.1	44.91	861.97
84	45.65	45.46	875.368
85	46.2	46.01	889.092
86	46.75	46.56	903.166
87	47.3	47.11	917.332
88	47.85	47.66	931.975
89	48.4	48.21	946.982
90	48.95	48.76	961.227
91	49.5	49.31	975.765
92	50.05	49.86	990.158
93	50.6	50.41	1004.54
94	51.15	50.96	1018.79
95	51.7	51.51	1032.38
96	52.25	52.06	1046.66
97	52.8	52.61	1060.59
98	53.35	53.16	1074.8
99	53.9	53.71	1089.08
100	54.45	54.26	1103.71
101	55	54.81	1118.16
102	55.55	55.36	1132.65
103	56.1	55.91	1146.79
104	56.65	56.46	1160.92
105	57.2	57.01	1174.39
106	57.75	57.56	1188.11
107	58.3	58.11	1201.5
108	58.85	58.66	1215.04
109	59.4	59.21	1229.32
110	59.95	59.76	1243.6
111	60.5	60.31	1258.22
112	61.05	60.86	1272.59
113	61.6	61.41	1286.98
114	62.15	61.96	1301.71
115	62.7	62.51	1315.87
116	63.25	63.06	1330.45
117	63.8	63.61	1344.71
118	64.35	64.16	1358.62
119	64.9	64.71	1372.62
120	65.45	65.26	1386.62
121	66	65.81	1400.62
122	66.55	66.36	1415.92
123	67.1	66.91	1431.9
124	67.65	67.46	1447.89
125	68.2	68.01	1463.27
126	68.75	68.56	1478.74
127	69.3	69.11	1494.22
128	69.85	69.66	1509.68
129	70.4	70.21	1525.09
130	70.95	70.76	1540.51
131	71.5	71.31	1556.34
132	72.05	71.86	1571.99
133	72.6	72.41	1588.02
134	73.15	72.96	1604.08
135	73.7	73.51	1620.58
136	74.25	74.06	1637.11
137	74.8	74.61	1654.01
138	75.35	75.16	1670.18
139	75.9	75.71	1686.02
140	76.45	76.26	1702.25
141	77	76.81	1719.77
142	77.55	77.36	1736.97
143	78.1	77.91	1754.17
144	78.65	78.46	1770.6
145	79.2	79.01	1787.4
146	79.75	79.56	1804.23
147	80.3	80.11	1821.97
148	80.85	80.66	1839.34
149	81.4	81.21	1856.5
150	81.95	81.76	1872.57
151	82.5	82.31	1888.99
152	83.05	82.86	1905.46
153	83.6	83.41	1922.01
154	84.15	83.96	1938.21
155	84.7	84.51	1955.51
156	85.25	85.06	1972.76
157	85.8	85.61	1990
158	86.35	86.16	2007.35
159	86.9	86.71	2025.24
160	87.45	87.26	2043.51
161	88	87.81	2060.99
162	88.55	88.36	2078.1
163	89.1	88.91	2095.22
164	89.65	89.46	2112.53
165	90.2	90.01	2129.75
166	90.75	90.56	2147.34
167	91.3	91.11	2165.32
168	91.85	91.66	2184
169	92.4	92.21	2202.29
170	92.95	92.76	2219.39
171	93.5	93.31	2236.56
172	94.05	93.86	2253.39
173	94.6	94.41	2270.87
174	95.15	94.96	2288.78
175	95.7	95.51	2306.32
176	96.25	96.06	2326.61
177	96.8	96.61	2346.9
178	97.35	97.16	2366.62
179	97.9	97.71	2385.38
180	98.45	98.26	2404.54
181	99	98.81	2423.8
182	99.55	99.36	2443.08
183	100.1	99.91	2462.51
184	100.65	100.46	2480.89
185	101.2	101.01	2499.65
186	101.75	101.56	2517.8
187	102.3	102.11	2535.12
188	102.85	102.66	2552.8
189	103.4	103.21	2570.84
190	103.95	103.76	2589.02
191	104.5	104.31	2607.2
192	105.05	104.86	2624.54
193	105.6	105.41	2641.8
194	106.15	105.96	2659.1
195	106.7	106.51	2678.04
196	107.25	107.06	2696.61
197	107.8	107.61	2714.85
198	108.35	108.16	2732.72
199	108.9	108.71	2750.24
200	109.45	109.26	2767.45
201	110	109.81	2784.28
202	110.55	110.36	2801.45
203	111.1	110.91	2818.39
204	111.65	111.46	2835.1
205	112.2	112.01	2851.82
206	112.75	112.56	2869.82
207	113.3	113.11	2888.01
208	113.85	113.66	2906.21
209	114.4	114.21	2924.22
210	114.95	114.76	2942.9
211	115.5	115.31	2961.21
212	116.05	115.86	2980.45
213	116.6	116.41	2999.69
214	117.15	116.96	3018.71
215	117.7	117.51	3037.35
216	118.25	118.06	3055.99
217	118.8	118.61	3074.14
218	119.35	119.16	3092.04
219	119.9	119.71	3110.29
220	120.45	120.26	3128.51
221	121	120.81	3146.72
222	121.55	121.36	3165.28
223	122.1	121.91	3185.72
224	122.65	122.46	3206.57
225	123.2	123.01	3226.77
226	123.75	123.56	3246.86
227	124.3	124.11	3267.21
228	124.85	124.66	3286.71
229	125.4	125.21	3306.58
230	125.95	125.76	3325.9
231	126.5	126.31	3345.5
232	127.05	126.86	3365.15
233	127.6	127.41	3385.11
234	128.15	127.96	3405.46
235	128.7	128.51	3425.45
236	129.25	129.06	3445.16
237	129.8	129.61	3464.87
238	130.35	130.16	3483.79
239	130.9	130.71	3503.07
240	131.45	131.26	3522.05
241	132	131.81	3540.56
242	132.55	132.36	3559.08
243	133.1	132.91	3578.33
244	133.65	133.46	3598.29
245	134.2	134.01	3617.72
246	134.75	134.56	3635.79
247	135.3	135.11	3653.85
248	135.85	135.66	3672
249	136.4	136.21	3690.65
250	136.95	136.76	3708.95
251	137.5	137.31	3727.1
252	138.05	137.86	3745.5
253	138.6	138.41	3763.56
254	139.15	138.96	3782.99
255	139.7	139.51	3802.25
256	140.25	140.06	3821.6
257	140.8	140.61	3841.62
258	141.35	141.16	3861.27
259	141.9	141.71	3880.95
260	142.45	142.26	3900.48
261	143	142.81	3919.72
262	143.55	143.36	3939.9
263	144.1	143.91	3960.07
264	144.65	144.46	3979.64
265	145.2	145.01	3999.42
266	145.75	145.56	4019.16
267	146.3	146.11	4037.86
268	146.85	146.66	4056.92
269	147.4	147.21	4076.09
270	147.95	147.76	4095.43
271	148.5	148.31	4114.76
272	149.05	148.86	4134.01
273	149.6	149.41	4153.68
274	150.15	149.96	4173.32
275	150.7	150.51	4192.84
276	151.25	151.06	4212.36
277	151.8	151.61	4231.44
278	152.35	152.16	4250.31
279	152.9	152.71	4269.17
280	153.45	153.26	4288.05
281	154	153.81	4306.93
282	154.55	154.36	4326.36
283	155.1	154.91	4346.74
284	155.65	155.46	4367.11
285	156.2	156.01	4386.61
286	156.75	156.56	4406.01
287	157.3	157.11	4425.51
288	157.85	157.66	4445.25
289	158.4	158.21	4464.99
290	158.95	158.76	4483.78
291	159.5	159.31	4502.65
292	160.05	159.86	4521.39
293	160.6	160.41	4541.83
294	161.15	160.96	4562.26
295	161.7	161.51	4582.22
296	162.25	162.06	4601.93
297	162.8	162.61	4621.99
298	163.35	163.16	4641.61
299	163.9	163.71	4661.22
300	164.45	164.26	4680.95
301	165	164.81	4701.1
302	165.55	165.36	4720.87
303	166.1	165.91	4740.54
304	166.65	166.46	4760.21
305	167.2	167.01	4780.68
306	167.75	167.56	4801.08
307	168.3	168.11	4821.48
308	168.85	168.66	4842.29
309	169.4	169.21	4862.73
310	169.95	169.76	4882.11
311	170.5	170.31	4901.4
312	171.05	170.86	4920.33
313	171.6	171.41	4939.11
314	172.15	171.96	4958.24
315	172.7	172.51	4977.56
316	173.25	173.06	4997.41
317	173.8	173.61	5017.63
318	174.35	174.16	5037.28
319	174.9	174.71	5056.92
320	175.45	175.26	5077.16
321	176	175.81	5097.24
322	176.55	176.36	5117.66
323	177.1	176.91	5136.66
324	177.65	177.46	5156.01
325	178.2	178.01	5174.82
326	178.75	178.56	5193.4
327	179.3	179.11	5212.32
328	179.85	179.66	5232.36
329	180.4	180.21	5253.08
330	180.95	180.76	5273.04
331	181.5	181.31	5292.75
332	182.05	181.86	5312.11
333	182.6	182.41	5331.51
334	183.15	182.96	5350.52
335	183.7	183.51	5369.94
336	184.25	184.06	5389.18
337	184.8	184.61	5408.76
338	185.35	185.16	5430.22
339	185.9	185.71	5452.77
340	186.45	186.26	5474.11
341	187	186.81	5495.14
342	187.55	187.36	5516.07
343	188.1	187.91	5538.56
344	188.65	188.46	5560.64
345	189.2	189.01	5579.52
346	189.75	189.56	5597.93
347	190.3	190.11	5617.15
348	190.85	190.66	5636.84
349	191.4	191.21	5656.9
350	191.95	191.76	5676.68
351	192.5	192.31	5696.82
352	193.05	192.86	5716.83
353	193.6	193.41	5736.29
354	194.15	193.96	5756.11
355	194.7	194.51	5774.46
356	195.25	195.06	5793.03
357	195.8	195.61	5811.42
358	196.35	196.16	5830.55
359	196.9	196.71	5849.68
360	197.45	197.26	5868.1
361	198	197.81	5886.72
362	198.55	198.36	5905.14
363	199.1	198.91	5925.83
364	199.65	199.46	5946.13
365	200.2	200.01	5967.27
366	200.75	200.56	5988.59
367	201.3	201.11	6008.73
368	201.85	201.66	6027.92
369	202.4	202.21	6047.11
370	202.95	202.76	6066.77
371	203.5	203.31	6086.93
372	204.05	203.86	6106.67
373	204.6	204.41	6126.71
374	205.15	204.96	6146.75
375	205.7	205.51	6166
376	206.25	206.06	6185.56
377	206.8	206.61	6205.33
378	207.35	207.16	6224.92
379	207.9	207.71	6244.91
380	208.45	208.26	6265.25
381	209	208.81	6285.96
382	209.55	209.36	6306.18
383	210.1	209.91	6325.78
384	210.65	210.46	6346.05
385	211.2	211.01	6367.22
386	211.75	211.56	6387.99
387	212.3	212.11	6409.05
388	212.85	212.66	6430.11
389	213.4	213.21	6449.44
390	213.95	213.76	6468.3
391	214.5	214.31	6487.41
392	215.05	214.86	6508.78
393	215.6	215.41	6530.54
394	216.15	215.96	6550.48
395	216.7	216.51	6569.66
396	217.25	217.06	6590.11
397	217.8	217.61	6611.98
398	218.35	218.16	6633.31
399	218.9	218.71	6654.4
400	219.45	219.26	6675.47
401	220	219.81	6695.1
402	220.55	220.36	6714.93
403	221.1	220.91	6734.95
404	221.65	221.46	6754.85
405	222.2	222.01	6775.2
406	222.75	222.56	6796.66
407	223.3	223.11	6817.73
408	223.85	223.66	6837.81
409	224.4	224.21	6857.56
410	224.95	224.76	6876.75
411	225.5	225.31	6894.73
412	226.05	225.86	6913.03
413	226.6	226.41	6933.2
414	227.15	226.96	6953.44
415	227.7	227.51	6973.75
416	228.25	228.06	6993.72
417	228.8	228.61	7013.38
418	229.35	229.16	7034.46
419	229.9	229.71	7055.52
420	230.45	230.26	7076.34
421	231	230.81	7096.72
422	231.55	231.36	7117.58
423	232.1	231.91	7138.55
424	232.65	232.46	7159.64
425	233.2	233.01	7183.04
426	233.75	233.56	7206.15
427	234.3	234.11	7227.69
428	234.85	234.66	7248.84
429	235.4	235.21	7270.31
430	235.95	235.76	7291.78
431	236.5	236.31	7311.01
432	237.05	236.86	7329.8
433	237.6	237.41	7349.21
434	238.15	237.96	7370.96
435	238.7	238.51	7392.33
436	239.25	239.06	7414.38
437	239.8	239.61	7436.41
438	240.35	240.16	7457.47
439	240.9	240.71	7477.94
440	241.45	241.26	7498.46
441	242	241.81	7518.73
442	242.55	242.36	7538.68
443	243.1	242.91	7557.28
444	243.65	243.46	7576.22
445	244.2	244.01	7595.22
446	244.75	244.56	7614.24
447	245.3	245.11	7633.5
448	245.85	245.66	7654.58
449	246.4	246.21	7675.59
450	246.95	246.76	7694.81
451	247.5	247.31	7713.66
452	248.05	247.86	7733.28
453	248.6	248.41	7753.18
454	249.15	248.96	7773.05
455	249.7	249.51	7792.45
456	250.25	250.06	7812.2
457	250.8	250.61	7833.15
458	251.35	251.16	7854.24
459	251.9	251.71	7874.22
460	252.45	252.26	7893.62
461	253	252.81	7913.12
462	253.55	253.36	7932.95
463	254.1	253.91	7952.77
464	254.65	254.46	7973.73
465	255.2	255.01	7994.79
466	255.75	255.56	8016.26
467	256.3	256.11	8037.9
468	256.85	256.66	8060.01
469	257.4	257.21	8082.52
470	257.95	257.76	8104.1
471	258.5	258.31	8124.48
472	259.05	258.86	8145.29
473	259.6	259.41	8168.22
474	260.15	259.96	8191.04
475	260.7	260.51	8213.11
476	261.25	261.06	8235.15
477	261.8	261.61	8255.95
478	262.35	262.16	8276.74
479	262.9	262.71	8297.71
480	263.45	263.26	8318.74
481	264	263.81	8340
482	264.55	264.36	8361.42
483	265.1	264.91	8383.13
484	265.65	265.46	8405.27
485	266.2	266.01	8426.94
486	266.75	266.56	8447.56
487	267.3	267.11	8468.14
488	267.85	267.66	8488.25
489	268.4	268.21	8508.37
490	268.95	268.76	8528.88
491	269.5	269.31	8549.51
492	270.05	269.86	8569.62
493	270.6	270.41	8589.32
494	271.15	270.96	8608.98
495	271.7	271.51	8628.54
496	272.25	272.06	8648.09
497	272.8	272.61	8668.17
498	273.35	273.16	8688.31
499	273.9	273.71	8708.86
500	274.45	274.26	8729.7
501	275	274.81	8750.14
502	275.55	275.36	8769.95
503	276.1	275.91	8789.86
504	276.65	276.46	8811.46
505	277.2	277.01	8833.03
506	277.75	277.56	8852.48
507	278.3	278.11	8871.72
508	278.85	278.66	8891.25
509	279.4	279.21	8910.99
510	279.95	279.76	8930.56
511	280.5	280.31	8949.63
512	281.05	280.86	8968.7
513	281.6	281.41	8988.21
514	282.15	281.96	9007.8
515	282.7	282.51	9027.31
516	283.25	283.06	9046.76
517	283.8	283.61	9066.2
518	284.35	284.16	9085.63
519	284.9	284.71	9105.04
520	285.45	285.26	9126.03
521	286	285.81	9147.32
522	286.55	286.36	9167.61
523	287.1	286.91	9187.44
524	287.65	287.46	9206.51
525	288.2	288.01	9224.43
526	288.75	288.56	9242.36
527	289.3	289.11	9261.83
528	289.85	289.66	9281.49
529	290.4	290.21	9300.67
530	290.95	290.76	9319.49
531	291.5	291.31	9338.3
532	292.05	291.86	9357.03
533	292.6	292.41	9375.74
534	293.15	292.96	9393.96
535	293.7	293.51	9412
536	294.25	294.06	9429.85
537	294.8	294.61	9447.17
538	295.35	295.16	9464.47
539	295.9	295.71	9483.6
540	296.45	296.26	9503.58
541	297	296.81	9523.07
542	297.55	297.36	9541.81
543	298.1	297.91	9560.53
544	298.65	298.46	9578.32
545	299.2	299.01	9596.1
546	299.75	299.56	9614.36
547	300.3	300.11	9633.12
548	300.85	300.66	9651.77
549	301.4	301.21	9669.02
550	301.95	301.76	9686.27
551	302.5	302.31	9703.6
552	303.05	302.86	9721.03
553	303.6	303.41	9738.43
554	304.15	303.96	9755.05
555	304.7	304.51	9771.61
556	305.25	305.06	9788.95
557	305.8	305.61	9808.65
558	306.35	306.16	9828.34
559	306.9	306.71	9847.21
560	307.45	307.26	9866.01
561	308	307.81	9884.24
562	308.55	308.36	9901.98
563	309.1	308.91	9919.74
564	309.65	309.46	9938.54
565	310.2	310.01	9957.35
566	310.75	310.56	9975.76
567	311.3	311.11	9993.96
568	311.85	311.66	10012
569	312.4	312.21	10029.3
570	312.95	312.76	10046.7
571	313.5	313.31	10064.6
572	314.05	313.86	10082.8
573	314.6	314.41	10100.7
574	315.15	314.96	10117.4
575	315.7	315.51	10134.1
576	316.25	316.06	10151.3
577	316.8	316.61	10169.1
578	317.35	317.16	10186.8
579	317.9	317.71	10204.7
580	318.45	318.26	10222.5
581	319	318.81	10240.7
582	319.55	319.36	10259.3
583	320.1	319.91	10277.8
584	320.65	320.46	10295.4
585	321.2	321.01	10313
586	321.75	321.56	10331.3
587	322.3	322.11	10350
588	322.85	322.66	10368.7
589	323.4	323.21	10387.6
590	323.95	323.76	10406.6
591	324.5	324.31	10425.7
592	325.05	324.86	10444.7
593	325.6	325.41	10462.5
594	326.15	325.96	10478.7
595	326.7	326.51	10495
596	327.25	327.06	10511
597	327.8	327.61	10527
598	328.35	328.16	10543.1
599	328.9	328.71	10561.7
600	329.45	329.26	10580.3
601	330	329.81	10599.1
602	330.55	330.36	10617.9
603	331.1	330.91	10636.5
604	331.65	331.46	10654.5
605	332.2	332.01	10672.5
606	332.75	332.56	10690.5
607	333.3	333.11	10708.5
608	333.85	333.66	10726.9
609	334.4	334.21	10746.2
610	334.95	334.76	10765.6
611	335.5	335.31	10784.1
612	336.05	335.86	10802.6
613	336.6	336.41	10820.6
614	337.15	336.96	10838.3
615	337.7	337.51	10856.1
616	338.25	338.06	10875.4
617	338.8	338.61	10894.7
618	339.35	339.16	10912.9
619	339.9	339.71	10930.8
620	340.45	340.26	10949.2
621	341	340.81	10968.9
622	341.55	341.36	10988.6
623	342.1	341.91	11006.2
624	342.65	342.46	11023.7
625	343.2	343.01	11041.7
626	343.75	343.56	11060.1
627	344.3	344.11	11078.5
628	344.85	344.66	11097.6
629	345.4	345.21	11116.7
630	345.95	345.76	11136.5
631	346.5	346.31	11156.5
632	347.05	346.86	11175.2
633	347.6	347.41	11192.3
634	348.15	347.96	11209.4
635	348.7	348.51	11227.6
636	349.25	349.06	11245.9
637	349.8	349.61	11264.6
638	350.35	350.16	11283.5
639	350.9	350.71	11302.1
640	351.45	351.26	11318.9
641	352	351.81	11335.8
642	352.55	352.36	11353.6
643	353.1	352.91	11372.5
644	353.65	353.46	11391.5
645	354.2	354.01	11411
646	354.75	354.56	11430.4
647	355.3	355.11	11448.1
648	355.85	355.66	11465.3
649	356.4	356.21	11482.5
650	356.95	356.76	11499.3
651	357.5	357.31	11516.2
652	358.05	357.86	11534.6
653	358.6	358.41	11554
654	359.15	358.96	11573.4
655	359.7	359.51	11592.9
656	360.25	360.06	11612.4
657	360.8	360.61	11630.8
658	361.35	361.16	11649.1
659	361.9	361.71	11667.4
660	362.45	362.26	11685.5
661	363	362.81	11703.8
662	363.55	363.36	11722.7
663	364.1	363.91	11741.7
664	364.65	364.46	11760.4
665	365.2	365.01	11779
666	365.75	365.56	11798.5
667	366.3	366.11	11819.9
668	366.85	366.66	11841.4
669	367.4	367.21	11862.7
670	367.95	367.76	11884
671	368.5	368.31	11905.3
672	369.05	368.86	11926.6
673	369.6	369.41	11949.4
674	370.15	369.96	11972.3
675	370.7	370.51	11993.4
676	371.25	371.06	12014.4
677	371.8	371.61	12036.7
678	372.35	372.16	12059.3
679	372.9	372.71	12082.5
680	373.45	373.26	12105.8
681	374	373.81	12130.9
682	374.55	374.36	12156.1
683	375.1	374.91	12180.6
684	375.65	375.46	12204.7
685	376.2	376.01	12227.2
686	376.75	376.56	12249.9
687	377.3	377.11	12273.4
688	377.85	377.66	12297.5
689	378.4	378.21	12323.7
690	378.95	378.76	12349.8
691	379.5	379.31	12375.9
692	380.05	379.86	12401.7
693	380.6	380.41	12427.4
694	381.15	380.96	12452.2
695	381.7	381.51	12477
696	382.25	382.06	12503.2
697	382.8	382.61	12530.3
698	383.35	383.16	12559.4
699	383.9	383.71	12588.4
700	384.45	384.26	12617.3
701	385	384.81	12645.7
702	385.55	385.36	12673.4
703	386.1	385.91	12700.4
704	386.65	386.46	12727.3
705	387.2	387.01	12754.4
706	387.75	387.56	12784.1
707	388.3	388.11	12812.8
708	388.85	388.66	12840.6
709	389.4	389.21	12867.4
710	389.95	389.76	12894.1
711	390.5	390.31	12921.6
712	391.05	390.86	12949.6
713	391.6	391.41	12978.3
714	392.15	391.96	13005.4
715	392.7	392.51	13032.2
716	393.25	393.06	13059
717	393.8	393.61	13086.6
718	394.35	394.16	13115.5
719	394.9	394.71	13143.3
720	395.45	395.26	13170.5
721	396	395.81	13196
722	396.55	396.36	13221.9
723	397.1	396.91	13248.8
724	397.65	397.46	13274.8
725	398.2	398.01	13300.2
726	398.75	398.56	13326.7
727	399.3	399.11	13353.7
728	399.85	399.66	13383.2
729	400.4	400.21	13412
730	400.95	400.76	13440.2
731	401.5	401.31	13467.8
732	402.05	401.86	13494.9
733	402.6	402.41	13519.9
734	403.15	402.96	13545.5
735	403.7	403.51	13572.4
736	404.25	404.06	13600.4
737	404.8	404.61	13629.2
738	405.35	405.16	13658.4
739	405.9	405.71	13687
740	406.45	406.26	13714.6
741	407	406.81	13742.4
742	407.55	407.36	13770.2
743	408.1	407.91	13796.3
744	408.65	408.46	13822.4
745	409.2	409.01	13848.4
746	409.75	409.56	13875.4
747	410.3	410.11	13903.4
748	410.85	410.66	13929.7
749	411.4	411.21	13955.6
750	411.95	411.76	13979
751	412.5	412.31	14002.4
752	413.05	412.86	14027.7
753	413.6	413.41	14053.3
754	414.15	413.96	14080.2
755	414.7	414.51	14106.2
756	415.25	415.06	14131.3
757	415.8	415.61	14155.6
758	416.35	416.16	14179.6
759	416.9	416.71	14204.5
760	417.45	417.26	14229.9
761	418	417.81	14251.7
762	418.55	418.36	14272.7
763	419.1	418.91	14294.9
764	419.65	419.46	14317.7
765	420.2	420.01	14340.9
766	420.75	420.56	14364.3
767	421.3	421.11	14390.1
768	421.85	421.66	14417.1
769	422.4	422.21	14441.9
770	422.95	422.76	14466.6
771	423.5	423.31	14493.4
772	424.05	423.86	14520.2
773	424.6	424.41	14546.5
774	425.15	424.96	14573.5
775	425.7	425.51	14601.2
776	426.25	426.06	14630.6
777	426.8	426.61	14659.9
778	427.35	427.16	14687.8
779	427.9	427.71	14715.8
780	428.45	428.26	14743.9
781	429	428.81	14770.3
782	429.55	429.36	14796.4
783	430.1	429.91	14823.1
784	430.65	430.46	14849.7
785	431.2	431.01	14876.2
786	431.75	431.56	14904.2
787	432.3	432.11	14933.4
788	432.85	432.66	14958.7
789	433.4	433.21	14984.2
790	433.95	433.76	15013.7
791	434.5	434.31	15042.2
792	435.05	434.86	15069.8
793	435.6	435.41	15097.4
794	436.15	435.96	15124.9
795	436.7	436.51	15152.9
796	437.25	437.06	15181.6
797	437.8	437.61	15211.3
798	438.35	438.16	15242.1
799	438.9	438.71	15273.2
800	439.45	439.26	15304.2
801	440	439.81	15335.4
802	440.55	440.36	15366.5
803	441.1	440.91	15397.4
804	441.65	441.46	15427.1
805	442.2	442.01	15456.6
806	442.75	442.56	15487.4
807	443.3	443.11	15518.3
808	443.85	443.66	15549.2
809	444.4	444.21	15581.2
810	444.95	444.76	15612
811	445.5	445.31	15641.9
812	446.05	445.86	15672.5
813	446.6	446.41	15703.1
814	447.15	446.96	15733.7
815	447.7	447.51	15765.2
816	448.25	448.06	15797.1
817	448.8	448.61	15829.7
818	449.35	449.16	15861.7
819	449.9	449.71	15894.1
820	450.45	450.26	15927.1
821	451	450.81	15959.9
822	451.55	451.36	15993.9
823	452.1	451.91	16028.6
824	452.65	452.46	16063.3
825	453.2	453.01	16096.2
826	453.75	453.56	16128.8
827	454.3	454.11	16161.6
828	454.85	454.66	16196
829	455.4	455.21	16230.9
830	455.95	455.76	16265.8
831	456.5	456.31	16299.2
832	457.05	456.86	16333.9
833	457.6	457.41	16369
834	458.15	457.96	16404.1
835	458.7	458.51	16440.3
836	459.25	459.06	16478.2
837	459.8	459.61	16515.8
838	460.35	460.16	16552.6
839	460.9	460.71	16589.1
840	461.45	461.26	16626.3
841	462	461.81	16665.4
842	462.55	462.36	16705.1
843	463.1	462.91	16744.4
844	463.65	463.46	16784.5
845	464.2	464.01	16825.2
846	464.75	464.56	16867.4
847	465.3	465.11	16907.1
848	465.85	465.66	16946.5
849	466.4	466.21	16986
850	466.95	466.76	17024.6
851	467.5	467.31	17066.2
852	468.05	467.86	17105.5
853	468.6	468.41	17148.1
854	469.15	468.96	17190.5
855	469.7	469.51	17232.6
856	470.25	470.06	17275.2
857	470.8	470.61	17317.7
858	471.35	471.16	17361.4
859	471.9	471.71	17407.2
860	472.45	472.26	17452.9
861	473	472.81	17498.7
862	473.55	473.36	17545.2
863	474.1	473.91	17586.4
864	474.65	474.46	17630.2
865	475.2	475.01	17675.7
866	475.75	475.56	17719.9
867	476.3	476.11	17764
868	476.85	476.66	17809.8
869	477.4	477.21	17856.7
870	477.95	477.76	17903.2
871	478.5	478.31	17948.5
872	479.05	478.86	17993.2
873	479.6	479.41	18037.5
874	480.15	479.96	18082.2
875	480.7	480.51	18128
876	481.25	481.06	18173.8
877	481.8	481.61	18219.5
878	482.35	482.16	18265.7
879	482.9	482.71	18311.8
880	483.45	483.26	18361.5
881	484	483.81	18404.8
882	484.55	484.36	18449.3
883	485.1	484.91	18493.4
884	485.65	485.46	18539.7
885	486.2	486.01	18586
886	486.75	486.56	18632.2
887	487.3	487.11	18677.9
888	487.85	487.66	18723.4
889	488.4	488.21	18769
890	488.95	488.76	18815
891	489.5	489.31	18862
892	490.05	489.86	18907.8
893	490.6	490.41	18952.6
894	491.15	490.96	19001.2
895	491.7	491.51	19048.8
896	492.25	492.06	19093.1
897	492.8	492.61	19139.2
898	493.35	493.16	19184.9
899	493.9	493.71	19225.7
900	494.45	494.26	19271.9
901	495	494.81	19317.2
902	495.55	495.36	19364.7
903	496.1	495.91	19411.1
904	496.65	496.46	19458.4
905	497.2	497.01	19506.4
906	497.75	497.56	19555.2
907	498.3	498.11	19602.9
908	498.85	498.66	19652
909	499.4	499.21	19700.2
910	499.95	499.76	19745.6
911	500.5	500.31	19789.5
912	501.05	500.86	19833.9
913	501.6	501.41	19880.9
914	502.15	501.96	19930.5
915	502.7	502.51	19979.2
916	503.25	503.06	20025.9
917	503.8	503.61	20072
918	504.35	504.16	20117.7
919	504.9	504.71	20163.4
920	505.45	505.26	20210.3
921	506	505.81	20257.1
922	506.55	506.36	20304.4
923	507.1	506.91	20352.4
924	507.65	507.46	20401
925	508.2	508.01	20450.2
926	508.75	508.56	20496
927	509.3	509.11	20540.7
928	509.85	509.66	20587.2
929	510.4	510.21	20634.6
930	510.95	510.759	20682.7
931	511.5	511.308	20730.7
932	512.05	511.857	20776.4
933	512.6	512.406	20823.2
934	513.15	512.955	20870.4
935	513.7	513.504	20917.8
936	514.25	514.052	20965.5
937	514.8	514.601	21014.9
938	515.35	515.15	21062.3
939	515.9	515.699	21109.2
940	516.45	516.248	21154.6
941	517	516.797	21201.1
942	517.55	517.346	21250.3
943	518.1	517.895	21299.6
944	518.65	518.444	21346.3
945	519.2	518.993	21390.2
946	519.75	519.542	21434.6
947	520.3	520.091	21482.3
948	520.85	520.64	21530.7
949	521.4	521.188	21577.7
950	521.95	521.737	21626
951	522.5	522.286	21675.8
952	523.05	522.835	21724.1
953	523.6	523.384	21770.2
954	524.15	523.933	21814.9
955	524.7	524.482	21859.2
956	525.25	525.031	21906.5
957	525.8	525.58	21953.2
958	526.35	526.129	22001.8
959	526.9	526.678	22049.8
960	527.45	527.227	22099.5
961	528	527.776	22149.8
962	528.55	528.324	22198.8
963	529.1	528.873	22244.5
964	529.65	529.422	22295.1
965	530.2	529.971	22345.2
966	530.75	530.52	22389.2
967	531.3	531.069	22435.8
968	531.85	531.618	22483.3
969	532.4	532.167	22529.3
970	532.95	532.716	22576.8
971	533.5	533.265	22625.7
972	534.05	533.814	22673.8
973	534.6	534.363	22723
974	535.15	534.912	22771.8
975	535.7	535.46	22820.5
976	536.25	536.009	22869.2
977	536.8	536.558	22918.5
978	537.35	537.107	22967.2
979	537.9	537.656	23013.9
980	538.45	538.205	23059.3
981	539	538.754	23104.1
982	539.55	539.303	23148.9
983	540.1	539.852	23194.9
984	540.65	540.401	23241.9
985	541.2	540.95	23289
986	541.75	541.499	23339.7
987	542.3	542.048	23388.4
988	542.85	542.597	23435.5
989	543.4	543.145	23483
990	543.95	543.694	23528.8
991	544.5	544.243	23575.2
992	545.05	544.792	23622.1
993	545.6	545.341	23667.8
994	546.15	545.89	23714.5
995	546.7	546.439	23762.5
996	547.25	546.988	23811.9
997	547.8	547.537	23864.1
998	548.35	548.086	23915.5
999	548.9	548.635	23965.4
1000	549.45	549.184	24015.4
1001	550	549.733	24069.2
1002	550.55	550.281	24119.5
1003	551.1	550.83	24168.4
1004	551.65	551.379	24215.9
1005	552.2	551.928	24263.5
1006	552.75	552.477	24313.6
1007	553.3	553.026	24362.9
1008	553.85	553.575	24414.7
1009	554.4	554.124	24466.8
1010	554.95	554.673	24510.8
1011	555.5	555.222	24558.2
1012	556.05	555.771	24609.3
1013	556.6	556.32	24662
1014	557.15	556.869	24714.4
1015	557.7	557.417	24766.3
1016	558.25	557.966	24817.8
1017	558.8	558.515	24867.9
1018	559.35	559.064	24919.1
1019	559.9	559.613	24968.8
1020	560.45	560.162	25020.2
1021	561	560.711	25072
1022	561.55	561.26	25123.3
1023	562.1	561.809	25172.9
1024	562.65	562.358	25222.8
1025	563.2	562.907	25275.9
1026	563.75	563.456	25330.2
1027	564.3	564.005	25383.5
1028	564.85	564.553	25435.1
1029	565.4	565.102	25486.6
1030	565.95	565.651	25538.2
1031	566.5	566.2	25589.2
1032	567.05	566.749	25639.6
1033	567.6	567.298	25690.2
1034	568.15	567.847	25742.6
1035	568.7	568.396	25795.1
1036	569.25	568.945	25847
1037	569.8	569.494	25899.9
1038	570.35	570.043	25949.6
1039	570.9	570.592	26000.4
1040	571.45	571.141	26053.1
1041	572	571.689	26102.6
1042	572.55	572.238	26154.3
1043	573.1	572.787	26206.7
1044	573.65	573.336	26256.6
1045	574.2	573.885	26311.1
1046	574.75	574.434	26363.7
1047	575.3	574.983	26412.6
1048	575.85	575.532	26465.1
1049	576.4	576.081	26515.5
1050	576.95	576.63	26566.8
1051	577.5	577.179	26619.8
1052	578.05	577.728	26673.9
1053	578.6	578.277	26726.7
1054	579.15	578.826	26777
1055	579.7	579.374	26827.7
1056	580.25	579.923	26880
1057	580.8	580.472	26933
1058	581.35	581.021	26985.3
1059	581.9	581.57	27037.4
1060	582.45	582.119	27089.8
1061	583	582.668	27141.9
1062	583.55	583.217	27192.2
1063	584.1	583.766	27240.1
1064	584.65	584.315	27287.2
1065	585.2	584.864	27332.8
1066	585.75	585.413	27377.2
1067	586.3	585.962	27425.3
1068	586.85	586.51	27474.5
1069	587.4	587.059	27523.4
1070	587.95	587.608	27577.8
1071	588.5	588.157	27627.7
1072	589.05	588.706	27673
1073	589.6	589.255	27717.1
1074	590.15	589.804	27764.6
1075	590.7	590.353	27813.8
1076	591.25	590.902	27864.1
1077	591.8	591.451	27911.6
1078	592.35	592	27960.7
1079	592.9	592.549	28013.5
1080	593.45	593.098	28068
1081	594	593.646	28118.7
1082	594.55	594.195	28170.2
1083	595.1	594.744	28223.8
1084	595.65	595.293	28275.4
1085	596.2	595.842	28323.7
1086	596.75	596.391	28372.6
1087	597.3	596.94	28418.8
1088	597.85	597.489	28464.5
1089	598.4	598.038	28512
1090	598.95	598.587	28560
1091	599.5	599.136	28608.3
1092	600.05	599.685	28657.9
1093	600.6	600.234	28708.7
1094	601.15	600.782	28759.3
1095	601.7	601.331	28809.5
1096	602.25	601.88	28859.1
1097	602.8	602.429	28907.8
1098	603.35	602.978	28956
1099	603.9	603.527	29003.9
1100	604.45	604.076	29051.8
1101	605	604.625	29098.9
1102	605.55	605.174	29145.2
1103	606.1	605.723	29191.8
1104	606.65	606.272	29235.8
1105	607.2	606.821	29282.8
1106	607.75	607.37	29328
1107	608.3	607.918	29374.8
1108	608.85	608.467	29424.6
1109	609.4	609.016	29474.4
1110	609.95	609.565	29522.5
1111	610.5	610.114	29570.1
1112	611.05	610.663	29617.7
1113	611.6	611.212	29664.7
1114	612.15	611.761	29710.8
1115	612.7	612.31	29758.3
1116	613.25	612.859	29808.4
1117	613.8	613.408	29862.2
1118	614.35	613.957	29914.8
1119	614.9	614.506	29967.4
1120	615.45	615.054	30020.4
1121	616	615.603	30070.8
1122	616.55	616.152	30124.3
1123	617.1	616.701	30176.7
1124	617.65	617.25	30227.4
1125	618.2	617.799	30277.3
1126	618.75	618.348	30329.7
1127	619.3	618.897	30380.3
1128	619.85	619.446	30431.1
1129	620.4	619.995	30482.6
1130	620.95	620.544	30534.4
1131	621.5	621.093	30586.1
1132	622.05	621.642	30636.8
1133	622.6	622.191	30687.2
1134	623.15	622.739	30737.6
1135	623.7	623.288	30787.9
1136	624.25	623.837	30837.3
1137	624.8	624.386	30883.7
1138	625.35	624.935	30932.9
1139	625.9	625.484	30982.8
1140	626.45	626.033	31031.9
1141	627	626.582	31085.5
1142	627.55	627.131	31140.7
1143	628.1	627.68	31193.7
1144	628.65	628.229	31247.4
1145	629.2	628.778	31302.6
1146	629.75	629.327	31356
1147	630.3	629.875	31407.5
1148	630.85	630.424	31458.9
1149	631.4	630.973	31511
1150	631.95	631.522	31564.4
1151	632.5	632.071	31618.1
1152	633.05	632.62	31673.2
1153	633.6	633.169	31725
1154	634.15	633.718	31772.9
1155	634.7	634.267	31821
1156	635.25	634.816	31871
1157	635.8	635.365	31919.3
1158	636.35	635.914	31964.8
1159	636.9	636.463	32011.5
1160	637.45	637.011	32055.3
1161	638	637.56	32103.9
1162	638.55	638.109	32153.6
1163	639.1	638.658	32202.9
1164	639.65	639.207	32252.9
1165	640.2	639.756	32301.8
1166	640.75	640.305	32350
1167	641.3	640.854	32398.5
1168	641.85	641.403	32447.8
1169	642.4	641.952	32496.4
1170	642.95	642.501	32545.3
1171	643.5	643.05	32597.6
1172	644.05	643.599	32652.2
1173	644.6	644.147	32706.6
1174	645.15	644.696	32760.9
1175	645.7	645.245	32815.9
1176	646.25	645.794	32869.2
1177	646.8	646.343	32920.8
1178	647.35	646.892	32972.9
1179	647.9	647.441	33023.9
1180	648.45	647.99	33072.8
1181	649	648.539	33120.8
1182	649.55	649.088	33168
1183	650.1	649.637	33214.9
1184	650.65	650.186	33262.1
1185	651.2	650.735	33309.1
1186	651.75	651.283	33355.3
1187	652.3	651.832	33404.3
1188	652.85	652.381	33452.6
1189	653.4	652.93	33502.4
1190	653.95	653.479	33551.1
1191	654.5	654.028	33599.3
1192	655.05	654.577	33648
1193	655.6	655.126	33699.2
1194	656.15	655.675	33749.6
1195	656.7	656.224	33801.3
1196	657.25	656.773	33855.6
1197	657.8	657.322	33910.8
1198	658.35	657.871	33966.1
1199	658.9	658.419	34021.3
1200	659.45	658.968	34076.5
1201	660	659.517	34130
1202	660.55	660.066	34180.8
1203	661.1	660.615	34234.1
1204	661.65	661.164	34287
1205	662.2	661.713	34342.4
1206	662.75	662.262	34395.4
1207	663.3	662.811	34445.2
1208	663.85	663.36	34493.9
1209	664.4	663.909	34544.7
1210	664.95	664.458	34591.1
1211	665.5	665.007	34640.4
1212	666.05	665.556	34688.1
1213	666.6	666.104	34736.2
1214	667.15	666.653	34784.8
1215	667.7	667.202	34832
1216	668.25	667.751	34879.1
1217	668.8	668.3	34927.9
1218	669.35	668.849	34976.8
1219	669.9	669.398	35024
1220	670.45	669.947	35069.4
1221	671	670.496	35116.7
1222	671.55	671.045	35167
1223	672.1	671.594	35214.4
1224	672.65	672.143	35260.2
1225	673.2	672.692	35307.3
1226	673.75	673.24	35356.3
1227	674.3	673.789	35405.9
1228	674.85	674.338	35453.9
1229	675.4	674.887	35500.9
1230	675.95	675.436	35550.5
1231	676.5	675.985	35601.6
1232	677.05	676.534	35650.3
1233	677.6	677.083	35697.9
1234	678.15	677.632	35746.4
1235	678.7	678.181	35798.4
1236	679.25	678.73	35848.4
1237	679.8	679.279	35902.9
1238	680.35	679.828	35952
1239	680.9	680.376	36001.2
1240	681.45	680.925	36050.7
1241	682	681.474	36100.8
1242	682.55	682.023	36153.8
1243	683.1	682.572	36206.3
1244	683.65	683.121	36257.8
1245	684.2	683.67	36308.3
1246	684.75	684.219	36357.2
1247	685.3	684.768	36406.1
1248	685.85	685.317	36455.6
1249	686.4	685.866	36505.6
1250	686.95	686.415	36555
1251	687.5	686.964	36604.5
1252	688.05	687.512	36654.7
1253	688.6	688.061	36704.7
1254	689.15	688.61	36754.8
1255	689.7	689.159	36806.6
1256	690.25	689.708	36859.4
1257	690.8	690.257	36911.3
1258	691.35	690.806	36960.9
1259	691.9	691.355	37007.1
1260	692.45	691.904	37051.4
1261	693	692.453	37100.4
1262	693.55	693.002	37149.5
1263	694.1	693.551	37197.5
1264	694.65	694.1	37243.7
1265	695.2	694.648	37290
1266	695.75	695.197	37337.1
1267	696.3	695.746	37384
1268	696.85	696.295	37430.8
1269	697.4	696.844	37479.5
1270	697.95	697.393	37525.1
1271	698.5	697.942	37570.7
1272	699.05	698.491	37613.3
1273	699.6	699.04	37655.7
1274	700.15	699.589	37697.4
1275	700.7	700.138	37737.1
1276	701.25	700.687	37779.3
1277	701.8	701.236	37818.6
1278	702.35	701.785	37857.7
1279	702.9	702.333	37898.9
1280	703.45	702.882	37945.1
1281	704	703.431	37992.1
1282	704.55	703.98	38038.9
1283	705.1	704.529	38082
1284	705.65	705.078	38124.1
1285	706.2	705.627	38168.8
1286	706.75	706.176	38215.4
1287	707.3	706.725	38263.1
1288	707.85	707.274	38306.2
1289	708.4	707.823	38350.6
1290	708.95	708.372	38395
1291	709.5	708.921	38439.1
1292	710.05	709.469	38484.4
1293	710.6	710.018	38528.8
1294	711.15	710.567	38572.3
1295	711.7	711.116	38615.7
1296	712.25	711.665	38659.5
1297	712.8	712.214	38704.4
1298	713.35	712.763	38750.8
1299	713.9	713.312	38798.4
1300	714.45	713.861	38841.6
1301	715	714.41	38886.3
1302	715.55	714.959	38930.7
1303	716.1	715.508	38976
1304	716.65	716.057	39022.8
1305	717.2	716.605	39068.5
1306	717.75	717.154	39111.2
1307	718.3	717.703	39161.2
1308	718.85	718.252	39210.5
1309	719.4	718.801	39261.3
1310	719.95	719.35	39311.8
1311	720.5	719.899	39362.2
1312	721.05	720.448	39412.9
1313	721.6	720.997	39463.3
1314	722.15	721.546	39514.8
1315	722.7	722.095	39569
1316	723.25	722.644	39624.8
1317	723.8	723.193	39679.8
1318	724.35	723.741	39732.3
1319	724.9	724.29	39787.2
1320	725.45	724.839	39837.9
1321	726	725.388	39889.7
1322	726.55	725.937	39939.8
1323	727.1	726.486	39989.7
1324	727.65	727.035	40038.6
1325	728.2	727.584	40088.5
1326	728.75	728.133	40138.3
1327	729.3	728.682	40188.4
1328	729.85	729.231	40240.5
1329	730.4	729.78	40293.5
1330	730.95	730.329	40344.7
1331	731.5	730.877	40393.5
1332	732.05	731.426	40441.4
1333	732.6	731.975	40490.4
1334	733.15	732.524	40542.6
1335	733.7	733.073	40596.9
1336	734.25	733.622	40651.1
1337	734.8	734.171	40705.2
1338	735.35	734.72	40759.2
1339	735.9	735.269	40812
1340	736.45	735.818	40865.1
1341	737	736.367	40919.7
1342	737.55	736.916	40972.4
1343	738.1	737.465	41023.2
1344	738.65	738.013	41073
1345	739.2	738.562	41123.3
1346	739.75	739.111	41174.2
1347	740.3	739.66	41222.6
1348	740.85	740.209	41268.5
1349	741.4	740.758	41316.6
1350	741.95	741.307	41365.7
1351	742.5	741.856	41415.9
1352	743.05	742.405	41469.3
1353	743.6	742.954	41515.6
1354	744.15	743.503	41569.2
1355	744.7	744.052	41620
1356	745.25	744.601	41673.8
1357	745.8	745.15	41724.9
1358	746.35	745.698	41777.2
1359	746.9	746.247	41832.5
1360	747.45	746.796	41885.4
1361	748	747.345	41940.2
1362	748.55	747.894	41994.8
1363	749.1	748.443	42049.7
1364	749.65	748.992	42105.8
1365	750.2	749.541	42161.2
1366	750.75	750.09	42214.8
1367	751.3	750.639	42268.2
1368	751.85	751.188	42319.3
1369	752.4	751.737	42370.9
1370	752.95	752.286	42422.8
1371	753.5	752.834	42472.8
1372	754.05	753.383	42522.2
1373	754.6	753.932	42572.7
1374	755.15	754.481	42624.8
1375	755.7	755.03	42673.6
1376	756.25	755.579	42726.5
1377	756.8	756.128	42776.6
1378	757.35	756.677	42827.5
1379	757.9	757.226	42876.2
1380	758.45	757.775	42922.5
1381	759	758.324	42969.5
1382	759.55	758.873	43016.8
1383	760.1	759.422	43063.8
1384	760.65	759.97	43110.1
1385	761.2	760.519	43156.9
1386	761.75	761.068	43204.9
1387	762.3	761.617	43252.4
1388	762.85	762.166	43303.4
1389	763.4	762.715	43354
1390	763.95	763.264	43399.5
1391	764.5	763.813	43446.5
1392	765.05	764.362	43495.3
1393	765.6	764.911	43546.1
1394	766.15	765.46	43597.1
1395	766.7	766.009	43646.7
1396	767.25	766.558	43696.3
1397	767.8	767.106	43746.1
1398	768.35	767.655	43796.2
1399	768.9	768.204	43848.7
1400	769.45	768.753	43902.2
1401	770	769.302	43953.6
1402	770.55	769.851	44004.9
1403	771.1	770.4	44058.4
1404	771.65	770.949	44112.4
1405	772.2	771.498	44166
1406	772.75	772.047	44220.7
1407	773.3	772.596	44276
1408	773.85	773.145	44330
1409	774.4	773.694	44381.9
1410	774.95	774.242	44431
1411	775.5	774.791	44481.8
1412	776.05	775.34	44535
1413	776.6	775.889	44588
1414	777.15	776.438	44641
1415	777.7	776.987	44692.2
1416	778.25	777.536	44742.7
1417	778.8	778.085	44793.8
1418	779.35	778.634	44844.8
1419	779.9	779.183	44895.5
1420	780.45	779.732	44945.8
1421	781	780.281	44996.1
1422	781.55	780.83	45046.2
1423	782.1	781.378	45095
1424	782.65	781.927	45142.5
1425	783.2	782.476	45189.4
1426	783.75	783.025	45236.7
1427	784.3	783.574	45284.2
1428	784.85	784.123	45331.4
1429	785.4	784.672	45377.3
1430	785.95	785.221	45423.7
1431	786.5	785.77	45469.9
1432	787.05	786.319	45516.8
1433	787.6	786.868	45562.2
1434	788.15	787.417	45606.4
1435	788.7	787.966	45651.8
1436	789.25		45696.7
1437	789.8		45742.4
1438	790.35		45784.8
1439	790.9		45827
1440	791.45		45869.8
1441	792		45912.4
1442	792.55		45951
1443	793.1		45991.9
1444	793.65		46035.6
1445	794.2		46080.4
1446	794.75		46124
1447	795.3		46165.2
1448	795.85		46209.8
1449	796.4		46253.8
1450	796.95		46297.8
1451	797.5		46341.5
1452	798.05		46384.4
1453	798.6		46426.6
1454	799.15		46465.8
1455	799.7		46503.8
1456	800.25		46541.8
1457	800.8		46583.1
1458	801.35		46624.3
1459	801.9		46665.6
1460	802.45		46706.8
1461	803		46748.4
1462	803.55		46793.8
1463	804.1		46839.6
1464	804.65		46885.4
1465	805.2		46930.1
1466	805.75		46974.8
1467	806.3		47019.9
1468	806.85		47064.7
1469	807.4		47111
1470	807.95		47157.7
1471	808.5		47202.6
1472	809.05		47246.2
1473	809.6		47289.3
1474	810.15		47333.6
1475	810.7		47380.2
1476	811.25		47427.9
1477	811.8		47474.3
1478	812.35		47521.8
1479	812.9		47568.7
1480	813.45		47616.4
1481	814		47663.9
1482	814.55		47709.6
1483	815.1		47755.3
1484	815.65		47803.3
1485	816.2		47852.4
1486	816.75		47900.3
1487	817.3		47949.9
1488	817.85		48004.9
1489	818.4		48058
1490	818.95		48111
1491	819.5		48164.9
1492	820.05		48217.1
1493	820.6		48267.8
1494	821.15		48318.2
1495	821.7		48366.5
1496	822.25		48413.7
1497	822.8		48461
1498	823.35		48510.1
1499	823.9		48558.4
1500	824.45		48613.1
1501	825		48663.7
1502	825.55		48711.8
1503	826.1		48765.6
1504	826.65		48819
1505	827.2		48867.4
1506	827.75		48915.3
1507	828.3		48962.4
1508	828.85		49012.3
1509	829.4		49063.3
1510	829.95		49114.6
1511	830.5		49166.8
1512	831.05		49217.6
1513	831.6		49269.5
1514	832.15		49321.5
1515	832.7		49374.7
1516	833.25		49425.8
1517	833.8		49477.2
1518	834.35		49526.3
1519	834.9		49574.6
1520	835.45		49624.3
1521	836		49673
1522	836.55		49720.8
1523	837.1		49770.2
1524	837.65		49820.1
1525	838.2		49868.7
1526	838.75		49918.4
1527	839.3		49969.8
1528	839.85		50021.6
1529	840.4		50070.9
1530	840.95		50118.3
1531	841.5		50165.9
1532	842.05		50212.3
1533	842.6		50260.8
1534	843.15		50311.4
1535	843.7		50361.9
1536	844.25		50410.6
1537	844.8		50458.1
1538	845.35		50503.3
1539	845.9		50551.1
1540	846.45		50601.9
1541	847		50652.5
1542	847.55		50700.6
1543	848.1		50748.7
1544	848.65		50797.7
1545	849.2		50846.3
1546	849.75		50895.8
1547	850.3		50945.4
1548	850.85		50993.1
1549	851.4		51040.8
1550	851.95		51092.3
1551	852.5		51142.8
1552	853.05		51192.9
1553	853.6		51242.3
1554	854.15		51290.7
1555	854.7		51339.2
1556	855.25		51387
1557	855.8		51435.7
1558	856.35		51482.8
1559	856.9		51528.5
1560	857.45		51574.8
1561	858		51622.5
1562	858.55		51670.9
1563	859.1		51718.9
1564	859.65		51765.2
1565	860.2		51811.3
1566	860.75		51854.4
1567	861.3		51901.4
1568	861.85		51946.8
1569	862.4		51989.7
1570	862.95		52032.1
1571	863.5		52074.9
1572	864.05		52117.4
1573	864.6		52162.8
1574	865.15		52211.7
1575	865.7		52258.3
1576	866.25		52305.2
1577	866.8		52351.9
1578	867.35		52398.1
1579	867.9		52443
1580	868.45		52487.6
1581	869		52534.5
1582	869.55		52579.5
1583	870.1		52624.9
1584	870.65		52668
1585	871.2		52713.4
1586	871.75		52757.1
1587	872.3		52799.3
1588	872.85		52842.6
1589	873.4		52887.7
1590	873.95		52934.6
1591	874.5		52982.2
1592	875.05		53026.2
1593	875.6		53067.5
1594	876.15		53109.5
1595	876.7		53153.3
1596	877.25		53194.9
1597	877.8		53236.6
1598	878.35		53277.6
1599	878.9		53318.4
1600	879.45		53358.9
1601	880		53399.1
1602	880.55		53439.7
1603	881.1		53482
1604	881.65		53526.2
1605	882.2		53571.5
1606	882.75		53617.3
1607	883.3		53665.7
1608	883.85		53713.9
1609	884.4		53760.9
1610	884.95		53804
1611	885.5		53848.4
1612	886.05		53892.7
1613	886.6		53937.8
1614	887.15		53984
1615	887.7		54030.6
1616	888.25		54077.6
1617	888.8		54125
1618	889.35		54168.9
1619	889.9		54213
1620	890.45		54256.4
1621	891		54300.7
1622	891.55		54347.5
1623	892.1		54395.9
1624	892.65		54444.6
1625	893.2		54494.6
1626	893.75		54544.5
1627	894.3		54593.8
1628	894.85		54644.8
1629	895.4		54696.9
1630	895.95		54748
1631	896.5		54797
1632	897.05		54843.2
1633	897.6		54889.7
1634	898.15		54937.1
1635	898.7		54982.3
1636	899.25		55026.8
1637	899.8		55074.4
1638	900.35		55121.6
1639	900.9		55168.2
1640	901.45		55215.8
1641	902		55263.6
1642	902.55		55310.4
1643	903.1		55358.4
1644	903.65		55408.7
1645	904.2		55457.6
1646	904.75		55505.5
1647	905.3		55553.6
1648	905.85		55603.2
1649	906.4		55654
1650	906.95		55707.2
1651	907.5		55761.3
1652	908.05		55812.6
1653	908.6		55863.8
1654	909.15		55917.7
1655	909.7		55971.3
1656	910.25		56022.8
1657	910.8		56076.2
1658	911.35		56128.3
1659	911.9		56177.8
1660	912.45		56225.9
1661	913		56275.2
1662	913.55		56326.4
1663	914.1		56375.7
1664	914.65		56424.4
1665	915.2		56473.8
1666	915.75		56523.2
1667	916.3		56570.9
1668	916.85		56618.1
1669	917.4		56668.9
1670	917.95		56716.5
1671	918.5		56766.1
1672	919.05		56812.3
1673	919.6		56857.9
1674	920.15		56903.5
1675	920.7		56948.2
1676	921.25		56994
1677	921.8		57040.5
1678	922.35		57086
1679	922.9		57129.8
1680	923.45		57171.6
1681	924		57215.7
1682	924.55		57257.6
1683	925.1		57300.1
1684	925.65		57345.7
1685	926.2		57394.6
1686	926.75		57442.7
1687	927.3		57487.8
1688	927.85		57531.9
1689	928.4		57578.2
1690	928.95		57625.3
1691	929.5		57669
1692	930.05		57712.8
1693	930.6		57760.1
1694	931.15		57809.3
1695	931.7		57857.2
1696	932.25		57903.6
1697	932.8		57948.9
1698	933.35		57993.9
1699	933.9		58038.6
1700	934.45		58081
1701	935		58126.8
1702	935.55		58170.2
1703	936.1		58212.2
1704	936.65		58254.2
1705	937.2		58296.6
1706	937.75		58338.1
1707	938.3		58379.2
1708	938.85		58422.4
1709	939.4		58466.8
1710	939.95		58510.5
1711	940.5		58552.2
1712	941.05		58591.6
1713	941.6		58633.2
1714	942.15		58675.7
1715	942.7		58717.8
1716	943.25		58760
1717	943.8		58803.2
1718	944.35		58847.2
1719	944.9		58892.1
1720	945.45		58936.1
1721	946		58980.2
1722	946.55		59024.1
1723	947.1		59067.4
1724	947.65		59110
1725	948.2		59152.7
1726	948.75		59201.5
1727	949.3		59241.6
1728	949.85		59286.1
1729	950.4		59332.9
1730	950.95		59380.9
1731	951.5		59425.9
1732	952.05		59468.9
1733	952.6		59513.5
1734	953.15		59560.2
1735	953.7		59605.9
1736	954.25		59650.5
1737	954.8		59699.7
1738	955.35		59747.5
1739	955.9		59791.1
1740	956.45		59834.9
1741	957		59879
1742	957.55		59924.5
1743	958.1		59972.4
1744	958.65		60019.9
1745	959.2		60067.7
1746	959.75		60115.8
1747	960.3		60165.8
1748	960.85		60216.3
1749	961.4		60265.3
1750	961.95		60313.2
1751	962.5		60364.4
1752	963.05		60413.6
1753	963.6		60459.7
1754	964.15		60509.8
1755	964.7		60557.7
1756	965.25		60602.9
1757	965.8		60648.5
1758	966.35		60697
1759	966.9		60746.6
1760	967.45		60796.9
1761	968		60847.5
1762	968.55		60896
1763	969.1		60943.9
1764	969.65		60993.8
1765	970.2		61044.5
1766	970.75		61093.6
1767	971.3		61142.5
1768	971.85		61191.8
1769	972.4		61241.6
1770	972.95		61292.2
1771	973.5		61342.9
1772	974.05		61394.1
1773	974.6		61447
1774	975.15		61499.2
1775	975.7		61549.8
1776	976.25		61601.1
1777	976.8		61653.7
1778	977.35		61705.7
1779	977.9		61757
1780	978.45		61809.3
1781	979		61862.9
1782	979.55		61918.8
1783	980.1		61974.5
1784	980.65		62033.3
1785	981.2		62089
1786	981.75		62143.6
1787	982.3		62198.4
1788	982.85		62254.2
1789	983.4		62311.7
1790	983.95		62370.6
1791	984.5		62428
1792	985.05		62479.8
1793	985.6		62538.7
1794	986.15		62598.2
1795	986.7		62657.1
1796	987.25		62714.7
1797	987.8		62771.3
1798	988.35		62832.2
1799	988.9		62894.1
1800	989.45		62952.8
1801	990		63012
1802	990.55		63079.1
1803	991.1		63141.1
1804	991.65		63202.9
1805	992.2		63265
1806	992.75		63325.7
1807	993.3		63387.5
1808	993.85		63448.2
1809	994.4		63507.6
1810	994.95		63563.9
1811	995.5		63615
1812	996.05		63665.7
1813	996.6		63719.7
1814	997.15		63770.9
1815	997.7		63828.9
1816	998.25		63883.6
1817	998.8		63937.7
1818	999.35		63989.1
1819	999.9		64042.3
1820	1000.45		64100.1
1821	1001		64159.9
1822	1001.55		64218.4
1823	1002.1		64277.8
1824	1002.65		64339.9
1825	1003.2		64398.9
1826	1003.75		64456.8
1827	1004.3		64516.3
1828	1004.85		64577.2
1829	1005.4		64635.4
1830	1005.95		64696.8
1831	1006.5		64756
1832	1007.05		64817.4
1833	1007.6		64878.9
1834	1008.15		64939.1
1835	1008.7		64998.4
1836	1009.25		65053.9
1837	1009.8		65110.8
1838	1010.35		65173.1
1839	1010.9		65232.1
1840	1011.45		65293.1
1841	1012		65353.3
1842	1012.55		65415.3
1843	1013.1		65478.6
1844	1013.65		65539.4
1845	1014.2		65602.8
1846	1014.75		65663.1
1847	1015.3		65724.3
1848	1015.85		65787.8
1849	1016.4		65852.1
1850	1016.95		65913.9
1851	1017.5		65976.9
1852	1018.05		66041.9
1853	1018.6		66106.3
1854	1019.15		66170.1
1855	1019.7		66236.2
1856	1020.25		66299.2
1857	1020.8		66361.5
1858	1021.35		66423
1859	1021.9		66484.8
1860	1022.45		66541.4
1861	1023		66606
1862	1023.55		66667.1
1863	1024.1		66727
1864	1024.65		66789.9
1865	1025.2		66852.7
1866	1025.75		66913.4
1867	1026.3		66975.6
1868	1026.85		67040.9
1869	1027.4		67103.1
1870	1027.95		67167.1
1871	1028.5		67231.4
1872	1029.05		67296
1873	1029.6		67358.1
1874	1030.15		67420.6
1875	1030.7		67484.9
1876	1031.25		67545.8
1877	1031.8		67603.7
1878	1032.35		67665.8
1879	1032.9		67729.4
1880	1033.45		67793
1881	1034		67847.8
1882	1034.55		67908.4
1883	1035.1		67968.9
1884	1035.65		68028.6
1885	1036.2		68091.5
1886	1036.75		68158.1
1887	1037.3		68224.2
1888	1037.85		68289.4
1889	1038.4		68345.9
1890	1038.95		68403.4
1891	1039.5		68460.2
1892	1040.05		68516.5
1893	1040.6		68573.9
1894	1041.15		68631.1
1895	1041.7		68691.5
1896	1042.25		68751.2
1897	1042.8		68815.6
1898	1043.35		68879.3
1899	1043.9		68942.7
1900	1044.45		69009.5
1901	1045		69074
1902	1045.55		69140.9
1903	1046.1		69203.7
1904	1046.65		69268.1
1905	1047.2		69332
1906	1047.75		69394.4
1907	1048.3		69450.4
1908	1048.85		69510.6
1909	1049.4		69572.5
1910	1049.95		69632.2
1911	1050.5		69685.8
1912	1051.05		69741.5
1913	1051.6		69796.3
1914	1052.15		69854.2
1915	1052.7		69912.6
1916	1053.25		69969.2
1917	1053.8		70025.4
1918	1054.35		70080.8
1919	1054.9		70137.2
1920	1055.45		70189.6
1921	1056		70241.3
1922	1056.55		70296.4
1923	1057.1		70347.2
1924	1057.65		70398.6
1925	1058.2		70449.9
1926	1058.75		70499.5
1927	1059.3		70545.9
1928	1059.85		70594
1929	1060.4		70641
1930	1060.95		70687.8
1931	1061.5		70732.6
1932	1062.05		70778.7
1933	1062.6		70825.6
1934	1063.15		70873.1
1935	1063.7		70922.1
1936	1064.25		70976.4
1937	1064.8		71030.2
1938	1065.35		71078.4
1939	1065.9		71130.5
1940	1066.45		71181.5
1941	1067		71231.3
1942	1067.55		71280.4
1943	1068.1		71330.1
1944	1068.65		71383.4
1945	1069.2		71438
1946	1069.75		71490.7
1947	1070.3		71543.5
1948	1070.85		71592.4
1949	1071.4		71644.6
1950	1071.95		71697.5
1951	1072.5		71750.1
1952	1073.05		71803.6
1953	1073.6		71856.8
1954	1074.15		71909.7
1955	1074.7		71963.9
1956	1075.25		72018.8
1957	1075.8		72074.1
1958	1076.35		72132.1
1959	1076.9		72187.2
1960	1077.45		72244.2
1961	1078		72300.9
1962	1078.55		72362.9
1963	1079.1		72426.1
1964	1079.65		72486.3
1965	1080.2		72546.9
1966	1080.75		72608.3
1967	1081.3		72668.7
1968	1081.85		72727.3
1969	1082.4		72785
1970	1082.95		72842.9
1971	1083.5		72899.5
1972	1084.05		72955.6
1973	1084.6		73012
1974	1085.15		73066.1
1975	1085.7		73119.4
1976	1086.25		73172
1977	1086.8		73225.1
1978	1087.35		73280.5
1979	1087.9		73332.7
1980	1088.45		73387.3
1981	1089		73439.5
1982	1089.55		73495.5
1983	1090.1		73544.6
1984	1090.65		73598.1
1985	1091.2		73649.6
1986	1091.75		73700.6
1987	1092.3		73751.6
1988	1092.85		73803.7
1989	1093.4		73854.4
1990	1093.95		73902.8
[truncated: 3,936 more rows]
