# Supplementary material for: The EDC3 chronology for the EPICA Dome C ice core
Source: Copernicus journal article supplement (doi:10.5194/cp-3-485-2007), 2007-08-17
Supplement: Supplementary file 2 [file supplement_2.xls]

## Sheet: EDC3 on Dome Fuji
F. Parrenin, May 31, 2007.
Synchronisation of the EDC and Dome Fuji ice cores, and resulting EDC3 age scale on Dome Fuji.
Pointers come from isotopic records synchronisation and volcanic synchronisation (Narcisi et al., EPSL, 2005).
The isotopic records have been resampled every 100 yr, and then smoothed with a 3 pts running average.
A marker has been placed in general every peak, matching as a whole the maximums and the mid-transitions of the peak.
When peaks were not present (as during the termination), transitions were used.
The DF depth refers to the depth of the first drilling as used in Watanabe et al. (2003).
The EDC depth refers to the same composite depth used in Parrenin et al. (Climate of the Past, 2007), that is to say the EDC96 and EDC99 depths (uncorrected).
To obtain Dome Fuji record on the EDC3 time scale, synchronisation pointers were linearly interpolated through glaciological age scales (EDC3, DFGT-2006).
Pointers				EDC3 on Dome Fuji
Synchronisation type	DF depth	EDC(96,99) depth		depth DF	age EDC3 (yr BP)
Surface	0	0.4		0	-45.3074
Isotopic	365.7	370		1	-33.9958
Isotopic	421	420		2	-22.6746
Isotopic	476	468		3	-11.3436
Isotopic	610	585		4	0.142785
Isotopic	630	602		5	13.4642
Isotopic	655	624		6	27.6498
Isotopic	675	641		7	42.2141
Isotopic	686	650		8	57.6328
Isotopic	745	700		9	74.2651
Isotopic	765	718		10	91.4121
Isotopic	790	741		11	108.88
Isotopic	816.4	763		12	126.658
Isotopic	856.9	799		13	144.95
Isotopic	946	880		14	163.913
Isotopic	966	900		15	183.419
Isotopic	993	924		16	203.741
Isotopic	1011	941		17	225.326
Isotopic	1075.7	997.5		18	247.386
Isotopic	1150	1062		19	270.329
Isotopic	1191.6	1104		20	293.671
Isotopic	1292	1197.5		21	315.847
Isotopic	1337	1242		22	338.237
Volcanic	1361.9	1265.1		23	359.521
Isotopic	1491.4	1393.6		24	380.619
Isotopic	1512	1413		25	402.136
Isotopic	1542.7	1440		26	424.089
Isotopic	1605.7	1488.3		27	446.314
Isotopic	1736.3	1659.2		28	468.986
Isotopic	1790.5	1731		29	491.56
Isotopic	1815.4	1763		30	512.678
Volcanic	1849.6	1796.3		31	533.923
Isotopic	1878	1826		32	556.08
Isotopic	1939.3	1888.2		33	578.519
Isotopic	1953.5	1905.3		34	601.792
Isotopic	1980.3	1933.5		35	625.542
Isotopic	2000.1	1953.4		36	650.282
Isotopic	2014.3	1967.6		37	675.643
Isotopic	2027.5	1981.9		38	701.266
Isotopic	2066.4	2025.1		39	727.074
Isotopic	2085.1	2045.4		40	752.406
Volcanic	2117.8	2086.6		41	777.758
Isotopic	2138.4	2107.5		42	803.07
Volcanic	2170.2	2150.9		43	828.5
Isotopic	2189.3	2177		44	854.54
Isotopic	2205.1	2198		45	880.61
Isotopic	2225.5	2223.3		46	906.078
Isotopic	2235.7	2235.5		47	931.585
Isotopic	2277.7	2293		48	956.869
Isotopic	2284	2303.5		49	982.832
Isotopic	2293	2316		50	1010.03
Isotopic	2304.8	2332.2		51	1037.61
Isotopic	2320.8	2354		52	1065.54
Isotopic	2332.5	2370		53	1091.21
Isotopic	2401.4	2459.1		54	1116.36
Isotopic	2410.2	2469.7		55	1141.18
Isotopic	2420.8	2483.6		56	1166.07
Isotopic	2446.2	2513.5		57	1192.06
Isotopic	2459.3	2527		58	1218.31
Isotopic	2485.1	2565.8		59	1244.88
Isotopic	2501	2593		60	1271.87
				61	1299.93
				62	1327.83
				63	1355.58
				64	1382.49
				65	1409.21
				66	1436.77
				67	1464.74
				68	1493.91
				69	1523.45
				70	1553.34
				71	1582.24
				72	1610.85
				73	1638.48
				74	1665.41
				75	1691.41
				76	1717.68
				77	1744.16
				78	1772.48
				79	1801.55
				80	1831.76
				81	1861.97
				82	1892.15
				83	1923.2
				84	1954.41
				85	1985.5
	3030.92	3118.58		86	2015.45
			716971	87	2045.11
				88	2075.39
				89	2106.41
				90	2138.15
				91	2166.93
				92	2195.89
				93	2225.41
				94	2256.5
				95	2288.62
				96	2321.63
				97	2354.95
				98	2388.55
				99	2422.48
				100	2454.8
				101	2486.73
				102	2518.89
				103	2551.59
				104	2584.66
				105	2618.12
				106	2651.92
				107	2685.03
				108	2716.78
				109	2748.18
				110	2779.66
				111	2811.45
				112	2842.61
				113	2873.9
				114	2906.38
				115	2940.11
				116	2973.83
				117	3006.15
				118	3039.1
				119	3073.12
				120	3108.95
				121	3146.47
				122	3182.05
				123	3216.48
				124	3250.52
				125	3283.65
				126	3316.58
				127	3349.48
				128	3383.96
				129	3419.4
				130	3455.21
				131	3488.66
				132	3522.71
				133	3556.75
				134	3590.1
				135	3623.06
				136	3655.78
				137	3688.13
				138	3721.41
				139	3755.02
				140	3788.87
				141	3822.44
				142	3855.45
				143	3887.89
				144	3919.01
				145	3950.04
				146	3980.95
				147	4012.58
				148	4044.28
				149	4075.95
				150	4108.52
				151	4141.49
				152	4174.83
				153	4207.76
				154	4240.3
				155	4272.41
				156	4304.51
				157	4337.12
				158	4370.49
				159	4404.48
				160	4438.23
				161	4471.66
				162	4504.56
				163	4537.72
				164	4571.16
				165	4605.23
				166	4638.5
				167	4671.08
				168	4702.42
				169	4734.77
				170	4767.74
				171	4801.37
				172	4835.29
				173	4869.54
				174	4904.23
				175	4938.65
				176	4973
				177	5007.43
				178	5042.81
				179	5077.98
				180	5112.88
				181	5147.42
				182	5182.17
				183	5217.92
				184	5254.58
				185	5291.6
				186	5328.73
				187	5365.51
				188	5402.05
				189	5438.6
				190	5476.03
				191	5513.14
				192	5549.9
				193	5586.39
				194	5620.75
				195	5656.59
				196	5692.86
				197	5727.54
				198	5764.43
				199	5802.61
				200	5840.63
				201	5876.72
				202	5913.13
				203	5949.29
				204	5985.21
				205	6020.9
				206	6056.4
				207	6090.37
				208	6123.38
				209	6158.41
				210	6192.91
				211	6227.86
				212	6264.39
				213	6299.56
				214	6336.41
				215	6374.18
				216	6411.2
				217	6449.79
				218	6487.76
				219	6524.35
				220	6559.59
				221	6596.55
				222	6635.21
				223	6674.3
				224	6713.37
				225	6752.66
				226	6791.27
				227	6830.47
				228	6870.94
				229	6912.07
				230	6952.12
				231	6988.99
				232	7025.52
				233	7061.48
				234	7097.23
				235	7134.37
				236	7171.99
				237	7207.98
				238	7243.06
				239	7280.16
				240	7319.19
				241	7357.8
				242	7396.37
				243	7435.63
				244	7474.63
				245	7512.13
				246	7548.71
				247	7584.84
				248	7621.29
				249	7658.93
				250	7694.95
				251	7730.02
				252	7765.87
				253	7803.09
				254	7840.28
				255	7877.41
				256	7914.94
				257	7954.04
				258	7992.27
				259	8030.56
				260	8069.29
				261	8107.56
				262	8144.49
				263	8182.21
				264	8220.98
				265	8260.44
				266	8298.6
				267	8336.03
				268	8373.39
				269	8410.08
				270	8444.28
				271	8477.48
				272	8511.35
				273	8546.81
				274	8584.58
				275	8622.18
				276	8659.3
				277	8695.79
				278	8731.76
				279	8766.83
				280	8802.34
				281	8839.51
				282	8875.85
				283	8913.03
				284	8950.26
				285	8986.92
				286	9023.77
				287	9060.66
				288	9097.05
				289	9132.73
				290	9167.69
				291	9202.54
				292	9237
				293	9270.61
				294	9306.62
				295	9342.3
				296	9377.43
				297	9414.04
				298	9449.67
				299	9484.48
				300	9518.56
				301	9555.01
				302	9591.54
				303	9628.07
				304	9664.53
				305	9702.25
				306	9739.97
				307	9777.21
				308	9813.55
				309	9847.35
				310	9882.39
				311	9918.58
				312	9955.89
				313	9992.67
				314	10030.2
				315	10068.2
				316	10106
				317	10142
				318	10176.6
				319	10211.2
				320	10246.6
				321	10280.2
				322	10315
				323	10351.1
				324	10388.2
				325	10425.3
				326	10462.4
				327	10499.4
				328	10535.5
				329	10571.7
				330	10609
				331	10646.9
				332	10684.1
				333	10722.6
				334	10759.3
				335	10795.9
				336	10833.4
				337	10871.3
				338	10909.3
				339	10947.3
				340	10985.1
				341	11022.2
				342	11059.6
				343	11096.4
				344	11132.6
				345	11168.3
				346	11202.7
				347	11237.7
				348	11273.4
				349	11310.2
				350	11348.9
				351	11389.4
				352	11429.9
				353	11469.4
				354	11508.8
				355	11544.5
				356	11580
				357	11615.9
				358	11653.2
				359	11691.7
				360	11730.6
				361	11770
				362	11810.1
				363	11851.4
				364	11894.1
				365	11936.8
				366	11977.6
				367	12017.6
				368	12058.2
				369	12098.1
				370	12138.5
				371	12180.4
				372	12222.1
				373	12264.7
				374	12307.9
				375	12347.2
				376	12386.4
				377	12425.4
				378	12464.3
				379	12504.2
				380	12545.7
				381	12588.8
				382	12632.9
				383	12677.8
				384	12723.3
				385	12768.9
				386	12814.1
				387	12858.5
				388	12902.6
				389	12946.8
				390	12991.4
				391	13037.4
				392	13083.4
				393	13128.2
				394	13173.3
				395	13218.4
				396	13261.8
				397	13304.3
				398	13347
				399	13390.6
				400	13433.8
				401	13476.2
				402	13517.8
				403	13558.5
				404	13601
				405	13644.8
				406	13688.3
				407	13731.6
				408	13774.6
				409	13816.7
				410	13862
				411	13907.6
				412	13951.5
				413	13993.7
				414	14035.4
				415	14077.7
				416	14120.4
				417	14163
				418	14205
				419	14246.7
				420	14289.2
				421	14332.5
				422	14374.4
				423	14414.9
				424	14457.2
				425	14503.5
				426	14549.4
				427	14595.3
				428	14641.9
				429	14688.5
				430	14733.9
				431	14779.9
				432	14826.7
				433	14873.2
				434	14919.3
				435	14965.9
				436	15013
				437	15060.7
				438	15108.3
				439	15154.5
				440	15202.1
				441	15249.9
				442	15297.5
				443	15345.5
				444	15393.9
				445	15440.8
				446	15488.4
				447	15536.6
				448	15585.8
				449	15635.2
				450	15683
				451	15731.2
				452	15780.3
				453	15829.2
				454	15879.6
				455	15930.6
				456	15984.2
				457	16039.6
				458	16094.9
				459	16147.1
				460	16200.1
				461	16252.2
				462	16304.5
				463	16357.7
				464	16411.4
				465	16466.4
				466	16522
				467	16578.9
				468	16637.5
				469	16695.5
				470	16755.4
				471	16817
				472	16878.2
				473	16937.3
				474	16993.1
				475	17046.3
				476	17101.9
				477	17169
				478	17238.8
				479	17305.2
				480	17378
				481	17452.3
				482	17525.8
				483	17599
				484	17672.1
				485	17744.8
				486	17818.3
				487	17893.2
				488	17971.5
				489	18049.9
				490	18126.6
				491	18204.1
				492	18282.2
				493	18360.9
				494	18442.5
				495	18521
				496	18598
				497	18675.4
				498	18753.9
				499	18832.5
				500	18913.5
				501	18992.5
				502	19074.4
				503	19157.9
				504	19240.8
				505	19322.8
				506	19403.4
				507	19484.1
				508	19563.3
				509	19641.4
				510	19720.8
				511	19800.1
				512	19876.2
				513	19953.9
				514	20034.4
				515	20110
				516	20183.6
				517	20259.9
				518	20337.1
				519	20412
				520	20487.1
				521	20562.4
				522	20638.2
				523	20714.1
				524	20789.3
				525	20864
				526	20936.3
				527	21011.4
				528	21084.6
				529	21156.7
				530	21228.6
				531	21298.3
				532	21369
				533	21435.4
				534	21500
				535	21568.8
				536	21638.8
				537	21710.2
				538	21779.7
				539	21850
				540	21921.7
				541	21995.3
				542	22067.7
				543	22138.2
				544	22210.7
				545	22281.7
				546	22354.9
				547	22429.7
				548	22504.8
				549	22581.4
				550	22656.7
				551	22730.4
				552	22801.9
				553	22872.9
				554	22947.5
				555	23020.6
				556	23090.6
				557	23159.9
				558	23231.4
				559	23304
				560	23374.7
				561	23448.1
				562	23520.5
				563	23598
				564	23672.5
				565	23745.8
				566	23823.7
				567	23902.6
				568	23980.7
				569	24061.4
				570	24143.5
				571	24225.9
				572	24309.6
				573	24396.2
				574	24479.6
				575	24566.6
				576	24649.1
				577	24729.2
				578	24809.5
				579	24888.6
				580	24973.6
				581	25057.3
				582	25138.7
				583	25219
				584	25299
				585	25380.1
				586	25464
				587	25543
				588	25626.3
				589	25709.3
				590	25789.4
				591	25870.4
				592	25951.3
				593	26031.3
				594	26107.8
				595	26186.5
				596	26257.8
				597	26329.6
				598	26405.2
				599	26482.9
				600	26555.3
				601	26632.3
				602	26709.4
				603	26789
				604	26865.5
				605	26941.4
				606	27022.3
				607	27099.9
				608	27174.4
				609	27246.7
				610	27316.3
				611	27386.7
				612	27461
				613	27540
				614	27619.4
				615	27696.6
				616	27771.2
				617	27847.4
				618	27924.5
				619	28001.1
				620	28081
				621	28162.2
				622	28244.9
				623	28323.5
				624	28399.4
				625	28470.4
				626	28542.4
				627	28615.2
				628	28688.2
				629	28762.2
				630	28836.5
				631	28912.7
				632	28987.9
				633	29062.2
				634	29138.5
				635	29215.5
				636	29292.9
				637	29372.7
				638	29452.2
				639	29531.3
				640	29611.8
				641	29687.7
				642	29761.4
				643	29838.8
				644	29918
				645	29996.2
				646	30074.6
				647	30155.5
				648	30240.2
				649	30325
				650	30407.2
				651	30487
				652	30569
				653	30651.1
				654	30735.5
				655	30814.9
				656	30891.4
				657	30966.9
				658	31043.4
				659	31122.6
				660	31205.3
				661	31284.8
				662	31366.1
				663	31445.7
				664	31525.3
				665	31605.8
				666	31683.9
				667	31763.9
				668	31841.2
				669	31916.3
				670	31991.1
				671	32065.2
				672	32142.7
				673	32221.5
				674	32297.2
				675	32372
				676	32447.1
				677	32520.6
				678	32595.4
				679	32673.5
				680	32750.5
				681	32827.6
				682	32905.2
				683	32983.5
				684	33060.8
				685	33135
				686	33206.3
				687	33274.3
				688	33344.6
				689	33415
				690	33489
				691	33563.3
				692	33637.7
				693	33711.3
				694	33785.9
				695	33859.7
				696	33936
				697	34010.5
				698	34085
				699	34158.7
				700	34235.3
				701	34316.7
				702	34396
				703	34471.3
				704	34546
				705	34622.4
				706	34698.5
				707	34770.9
				708	34842.6
				709	34912.4
				710	34984.5
				711	35058.2
				712	35132.2
				713	35204.9
				714	35279
				715	35357.5
				716	35438.8
				717	35514.3
				718	35591.5
				719	35673.7
				720	35753.7
				721	35829.9
				722	35904.8
				723	35979.4
				724	36057.6
				725	36141.1
				726	36223
				727	36306.6
				728	36390
				729	36472
				730	36554.4
				731	36634.9
				732	36715.2
				733	36793.2
				734	36877.8
				735	36955.4
				736	37032.8
				737	37104.9
				738	37179.3
				739	37255.5
				740	37327.5
				741	37402
				742	37477
				743	37549.4
				744	37619.3
				745	37686
				746	37753.9
				747	37821.5
				748	37890.4
				749	37962.2
				750	38034.1
				751	38106.5
				752	38181.4
				753	38256.4
				754	38328.6
				755	38402.7
				756	38477.1
				757	38550.6
				758	38625
				759	38699.1
				760	38772.2
				761	38842.9
				762	38913.9
				763	38986
				764	39058.8
				765	39133.9
				766	39211.5
				767	39292.3
				768	39378.2
				769	39462.1
				770	39549.7
				771	39637.7
				772	39724.8
				773	39812.4
				774	39900.4
				775	39987.8
				776	40072.4
				777	40156.2
				778	40243.4
				779	40331.6
				780	40422.4
				781	40513.8
				782	40599.1
				783	40685.9
				784	40776.4
				785	40862.4
				786	40949.8
				787	41037.1
				788	41118
				789	41198.9
				790	41281.7
				791	41360.9
				792	41438.7
				793	41516.3
				794	41591.7
				795	41668.6
				796	41745.6
				797	41823.1
				798	41901.7
				799	41983
				800	42063.5
				801	42144.6
				802	42224.7
				803	42304.4
				804	42382.8
				805	42459.6
				806	42534.9
				807	42609.3
				808	42683.3
				809	42760.9
				810	42837
				811	42911.1
				812	42986.5
				813	43063.6
				814	43139.5
				815	43214.7
				816	43287.2
				817	43361.6
				818	43435.8
				819	43511.7
				820	43588.8
				821	43671.2
				822	43750.2
				823	43831.1
				824	43912.9
				825	43991.3
				826	44073.4
				827	44157.6
				828	44240
				829	44321.3
				830	44402.8
				831	44484.4
				832	44567.5
				833	44651
				834	44731.7
				835	44809.9
				836	44887.6
				837	44967.5
				838	45047
				839	45125.3
				840	45204.1
				841	45281.2
				842	45354.8
				843	45428.9
				844	45502.6
				845	45578.2
				846	45651.2
				847	45728.9
				848	45803
				849	45874.9
				850	45949.7
				851	46023.8
				852	46102.8
				853	46177.1
				854	46248.9
				855	46319.3
				856	46389
				857	46462.3
				858	46529.8
				859	46601.1
				860	46674.8
				861	46747.5
				862	46825.3
				863	46906
				864	46983.5
				865	47067.6
				866	47147.6
				867	47230.8
				868	47308.6
				869	47386.9
				870	47466.2
				871	47544.9
				872	47623.1
				873	47703.6
				874	47781.7
				875	47863.8
				876	47945.9
				877	48025.2
				878	48105.2
				879	48190.2
				880	48275.4
				881	48358.6
				882	48441.4
				883	48527.2
				884	48613.7
				885	48694.8
				886	48771.2
				887	48847.2
				888	48926.7
				889	49007.7
				890	49087.9
				891	49166.6
				892	49247.1
				893	49330
				894	49410.2
				895	49489.6
				896	49569.6
				897	49650.9
				898	49726.7
				899	49805.3
				900	49888.2
				901	49972.5
				902	50056.9
				903	50140.2
				904	50222.3
				905	50302.8
				906	50379.6
				907	50457.5
				908	50535.3
				909	50614.4
				910	50697.1
				911	50778.9
				912	50858.8
				913	50939.7
				914	51018.8
				915	51095.5
				916	51172.4
				917	51250.8
				918	51328.6
				919	51404
				920	51481.7
				921	51553.4
				922	51625.6
				923	51700
				924	51774.5
				925	51853.9
				926	51931.8
				927	52007.3
				928	52084.7
				929	52159.5
				930	52233.7
				931	52309.1
				932	52383.8
				933	52457.7
				934	52528.9
				935	52599.5
				936	52671.7
				937	52744.7
				938	52816.4
				939	52887.6
				940	52958.8
				941	53028.8
				942	53101.1
				943	53179
				944	53257.1
				945	53328.5
				946	53399.1
				947	53475.5
				948	53553.2
				949	53637.3
				950	53721.6
				951	53802.3
				952	53885.8
				953	53969.3
				954	54055.9
				955	54142.2
				956	54230.8
				957	54313.3
				958	54396.4
				959	54485.1
				960	54575
				961	54664.6
				962	54755.3
				963	54843.6
				964	54929.3
				965	55011.8
				966	55091.6
				967	55163.1
				968	55238.8
				969	55317.4
				970	55400.4
				971	55479.4
				972	55557.1
				973	55639
				974	55720.5
				975	55798
				976	55878.5
				977	55960
				978	56044.7
				979	56129.5
				980	56213.9
				981	56296.1
				982	56375.8
				983	56455.7
				984	56535.8
				985	56614.5
				986	56689.4
				987	56763.8
				988	56839.3
				989	56921.4
				990	56997.9
				991	57071.3
				992	57144.4
				993	57215.7
				994	57288.7
				995	57366.7
				996	57447.1
				997	57526.3
				998	57603
				999	57681.4
				1000	57763.3
				1001	57844.9
				1002	57924.8
				1003	58003.9
				1004	58076.9
				1005	58149
				1006	58222.8
				1007	58295.1
				1008	58368.4
				1009	58440.1
				1010	58511.9
				1011	58588
				1012	58659.2
				1013	58726.1
				1014	58794.4
				1015	58867
				1016	58939
				1017	59013.7
				1018	59089.1
				1019	59163
				1020	59235.6
				1021	59305.9
				1022	59378.5
				1023	59454.7
				1024	59528.2
				1025	59601
				1026	59673.1
				1027	59744
				1028	59818.1
				1029	59896.7
				1030	59976.8
				1031	60055.5
				1032	60135.1
				1033	60213.5
				1034	60288.6
				1035	60369.8
				1036	60451.2
				1037	60530.1
				1038	60611.2
				1039	60692.8
				1040	60774.6
				1041	60856.4
				1042	60935.7
				1043	61015.7
				1044	61094.9
				1045	61175.2
				1046	61254
				1047	61334.2
				1048	61416.4
				1049	61499.7
				1050	61579.2
				1051	61661.4
				1052	61744.5
				1053	61831.5
				1054	61912.7
				1055	61994.7
				1056	62076.2
				1057	62158.2
				1058	62246.2
				1059	62334.8
				1060	62425.6
				1061	62516.2
				1062	62608.7
				1063	62691.9
				1064	62781.9
				1065	62874.3
				1066	62964.9
				1067	63052.9
				1068	63144.3
				1069	63233.8
				1070	63319.9
				1071	63405.1
				1072	63493.8
				1073	63581.1
				1074	63665
				1075	63748
				1076	63834
				1077	63920.3
				1078	64006.3
				1079	64094.5
				1080	64183.4
				1081	64272.5
				1082	64363.9
				1083	64459.3
				1084	64554.1
				1085	64647.9
				1086	64740.9
				1087	64836.8
				1088	64930
				1089	65026.5
				1090	65123.1
				1091	65222.2
				1092	65323.2
				1093	65423.8
				1094	65524.6
				1095	65629
				1096	65736.9
				1097	65842.9
				1098	65944.9
				1099	66049.9
				1100	66159.7
				1101	66265
				1102	66361
				1103	66465
				1104	66566.3
				1105	66670.3
				1106	66770.1
				1107	66866.2
				1108	66965.1
				1109	67069.4
				1110	67171.1
				1111	67270
				1112	67369.1
				1113	67471.1
				1114	67571.6
				1115	67667.4
				1116	67769.7
				1117	67873.2
				1118	67977.6
				1119	68081.9
				1120	68181.9
				1121	68279.2
				1122	68373.7
				1123	68468.7
				1124	68565.8
				1125	68657.8
				1126	68749.2
				1127	68837.2
				1128	68931.1
				1129	69023.8
				1130	69122.3
				1131	69217.3
				1132	69306.2
				1133	69398.2
				1134	69487.2
				1135	69578.3
				1136	69667.1
				1137	69752.9
				1138	69839.9
				1139	69920.6
				1140	70005.7
				1141	70090.7
				1142	70171.5
				1143	70251.4
				1144	70332.9
				1145	70414.8
				1146	70487.9
				1147	70559.5
				1148	70630.5
				1149	70699.9
				1150	70774.5
				1151	70860.6
				1152	70947.2
				1153	71036.1
				1154	71122.1
				1155	71210.9
				1156	71299.3
				1157	71380.6
				1158	71472
				1159	71564.6
				1160	71656.8
				1161	71749.5
				1162	71841.9
				1163	71935.3
				1164	72032.2
				1165	72132
				1166	72236.7
				1167	72345.3
				1168	72452
				1169	72560.1
				1170	72662.8
				1171	72756.6
				1172	72859.2
				1173	72953.9
				1174	73054.4
				1175	73153.4
				1176	73254.2
				1177	73358.1
				1178	73457.1
				1179	73554.2
				1180	73648.8
				1181	73741.9
				1182	73834.7
				1183	73936.7
				1184	74035.6
				1185	74133.7
				1186	74229.6
				1187	74323.1
				1188	74414.7
				1189	74502.1
				1190	74587.9
				1191	74677.6
				1192	74767
				1193	74850.4
				1194	74934.4
				1195	75021.2
				1196	75105.5
				1197	75189.9
				1198	75275.9
				1199	75363
				1200	75448.6
				1201	75537.1
				1202	75627.6
				1203	75723.2
				1204	75818.6
				1205	75913.4
				1206	76005.4
				1207	76095.9
				1208	76181.9
				1209	76271.5
				1210	76359.7
				1211	76451.3
				1212	76546.4
				1213	76637.9
				1214	76732
				1215	76825.7
				1216	76917.6
				1217	77008.3
				1218	77098.7
				1219	77188.1
				1220	77280.3
				1221	77372.8
				1222	77470.5
				1223	77568.2
				1224	77657.3
				1225	77750.1
				1226	77838.6
				1227	77929.1
				1228	78018.5
				1229	78111.9
				1230	78198.2
				1231	78288.1
				1232	78375.7
				1233	78464.4
				1234	78551.8
				1235	78639.6
				1236	78722.1
				1237	78808.1
				1238	78892.5
				1239	78976.8
				1240	79060.8
				1241	79140.8
				1242	79226.3
				1243	79312.3
				1244	79399.9
				1245	79481.4
				1246	79565.1
				1247	79648.9
				1248	79729.6
				1249	79809.6
				1250	79886.7
				1251	79963.1
				1252	80039.7
				1253	80117.2
				1254	80195
				1255	80272.6
				1256	80350.7
				1257	80428.3
				1258	80511.4
				1259	80590.1
				1260	80669.9
				1261	80750.7
				1262	80828.9
				1263	80911.5
				1264	80996.4
				1265	81078.3
				1266	81160
				1267	81240.6
				1268	81320.6
				1269	81400.9
				1270	81484.6
				1271	81562.3
				1272	81638.1
				1273	81716.8
				1274	81795
				1275	81873.8
				1276	81948.7
				1277	82021.5
				1278	82095.7
				1279	82173.7
				1280	82252.5
				1281	82325.1
				1282	82399.1
				1283	82475.6
				1284	82550.1
				1285	82624.5
				1286	82701.5
				1287	82780.5
				1288	82858.5
				1289	82935.6
				1290	83009.8
				1291	83077.3
				1292	83147.9
				1293	83218.9
				1294	83292.3
				1295	83367.4
				1296	83441.9
				1297	83518.8
				1298	83593.6
				1299	83663
				1300	83735.7
				1301	83810.7
				1302	83887.2
				1303	83963.5
				1304	84041.9
				1305	84119.9
				1306	84198.2
				1307	84279.1
				1308	84358.2
				1309	84436.5
				1310	84517.5
				1311	84600.9
				1312	84684.7
				1313	84768
				1314	84851.9
				1315	84941.3
				1316	85027.1
				1317	85111.3
				1318	85198.3
				1319	85281
				1320	85366.8
				1321	85453.4
				1322	85544.2
				1323	85633.4
				1324	85721.1
				1325	85808.5
				1326	85898.9
				1327	85991
				1328	86081.9
				1329	86174
				1330	86265.4
				1331	86360.2
				1332	86455.5
				1333	86549.4
				1334	86638.8
				1335	86726.9
				1336	86814.4
				1337	86908.5
				1338	87004.2
				1339	87100.8
				1340	87202.7
				1341	87307.2
				1342	87412.1
				1343	87511.4
				1344	87606.4
				1345	87706.1
				1346	87806
				1347	87901.6
				1348	87991.2
				1349	88082.7
				1350	88172.8
				1351	88265.9
				1352	88363.9
				1353	88458.6
				1354	88555.9
				1355	88648.9
				1356	88742.3
				1357	88832
				1358	88930.4
				1359	89022.7
				1360	89114.3
				1361	89210.6
				1362	89305.3
				1363	89394.1
				1364	89487.5
				1365	89584.7
				1366	89681.6
				1367	89775.9
				1368	89871.8
				1369	89966.6
				1370	90057.5
				1371	90149.5
				1372	90247.1
				1373	90341.5
				1374	90435.4
				1375	90531.6
				1376	90630.2
				1377	90725.7
				1378	90816.2
				1379	90913.3
				1380	91013.3
				1381	91113.4
				1382	91217.2
				1383	91315.9
				1384	91412.2
				1385	91507.3
				1386	91603.9
				1387	91700.3
				1388	91797.4
				1389	91894.3
				1390	91995.8
				1391	92100.2
				1392	92204.4
				1393	92305
				1394	92398.7
				1395	92497.4
				1396	92596.7
				1397	92693.1
				1398	92789.1
				1399	92878.4
				1400	92979.4
				1401	93082.1
				1402	93176.4
				1403	93268.1
				1404	93366.9
				1405	93464.5
				1406	93568.5
				1407	93672.8
				1408	93769.6
				1409	93863.2
				1410	93952.5
				1411	94043.4
				1412	94134.8
				1413	94221.7
				1414	94316.1
				1415	94410.4
				1416	94509.8
				1417	94600.7
				1418	94688.9
				1419	94783.1
				1420	94882.3
				1421	94982.2
				1422	95081.9
				1423	95176.7
				1424	95271.1
				1425	95367.9
				1426	95462.3
				1427	95556.3
				1428	95646.3
				1429	95742.6
				1430	95835.8
				1431	95935.1
				1432	96033.2
				1433	96128.8
				1434	96221.2
				1435	96319.5
				1436	96418.1
				1437	96509.9
				1438	96604.1
				1439	96700.1
				1440	96792.7
				1441	96878.5
				1442	96976.1
				1443	97071.6
				1444	97165.7
				1445	97253.8
				1446	97345.9
				1447	97439.2
				1448	97527.2
				1449	97620.3
				1450	97707.9
				1451	97795.7
				1452	97885.4
				1453	97981.1
				1454	98072.9
				1455	98162.3
				1456	98263.8
				1457	98359.8
				1458	98457
				1459	98553.6
				1460	98650.2
				1461	98745.7
				1462	98838.8
				1463	98933.4
				1464	99028.6
				1465	99126
				1466	99224.1
				1467	99323.5
				1468	99424.4
				1469	99524.8
				1470	99620.6
				1471	99714.8
				1472	99812.4
				1473	99906.4
				1474	99997
				1475	100089
				1476	100180
				1477	100271
				1478	100362
				1479	100455
				1480	100547
				1481	100636
				1482	100726
				1483	100817
				1484	100907
				1485	100997
				1486	101087
				1487	101170
				1488	101258
				1489	101347
				1490	101433
				1491	101517
				1492	101603
				1493	101698
				1494	101797
				1495	101889
				1496	101980
				1497	102075
				1498	102166
				1499	102257
				1500	102360
				1501	102461
				1502	102562
				1503	102658
				1504	102759
				1505	102862
				1506	102956
				1507	103058
				1508	103160
				1509	103263
				1510	103364
				1511	103468
				1512	103577
				1513	103685
				1514	103790
				1515	103889
				1516	103986
				1517	104084
				1518	104181
				1519	104274
				1520	104369
				1521	104462
				1522	104553
				1523	104645
				1524	104738
				1525	104830
				1526	104919
				1527	105011
				1528	105098
				1529	105188
				1530	105278
				1531	105367
				1532	105462
				1533	105557
				1534	105648
				1535	105742
				1536	105830
				1537	105922
				1538	106018
				1539	106111
				1540	106206
				1541	106300
				1542	106394
				1543	106478
				1544	106553
				1545	106632
				1546	106706
				1547	106782
				1548	106863
				1549	106947
				1550	107032
				1551	107112
				1552	107195
				1553	107281
				1554	107368
				1555	107455
				1556	107546
				1557	107635
				1558	107730
				1559	107821
				1560	107911
				1561	107998
				1562	108094
				1563	108195
				1564	108291
				1565	108393
				1566	108487
				1567	108587
				1568	108688
				1569	108785
				1570	108880
				1571	108974
				1572	109069
				1573	109166
				1574	109263
				1575	109362
				1576	109455
				1577	109545
				1578	109633
				1579	109728
				1580	109821
				1581	109916
				1582	110010
				1583	110100
				1584	110193
				1585	110291
				1586	110383
				1587	110477
				1588	110573
				1589	110667
				1590	110758
				1591	110852
				1592	110947
				1593	111040
				1594	111133
				1595	111224
				1596	111314
				1597	111403
				1598	111496
				1599	111585
				1600	111675
				1601	111765
				1602	111856
				1603	111951
				1604	112043
				1605	112134
				1606	112237
				1607	112370
				1608	112492
				1609	112625
				1610	112754
				1611	112875
				1612	113001
				1613	113128
				1614	113257
				1615	113392
				1616	113529
				1617	113660
				1618	113794
				1619	113928
				1620	114056
				1621	114183
				1622	114309
				1623	114435
				1624	114560
				1625	114682
				1626	114808
				1627	114930
				1628	115046
				1629	115170
				1630	115296
				1631	115415
				1632	115532
				1633	115647
				1634	115752
				1635	115868
				1636	115977
				1637	116086
				1638	116194
				1639	116304
				1640	116409
				1641	116514
				1642	116620
				1643	116727
				1644	116833
				1645	116940
				1646	117053
				1647	117163
				1648	117278
				1649	117387
				1650	117497
				1651	117600
				1652	117709
				1653	117810
				1654	117921
				1655	118034
				1656	118151
				1657	118260
				1658	118372
				1659	118483
				1660	118593
				1661	118704
				1662	118808
				1663	118914
				1664	119021
				1665	119129
				1666	119235
				1667	119339
				1668	119445
				1669	119552
				1670	119657
				1671	119762
				1672	119865
				1673	119968
				1674	120070
				1675	120174
				1676	120280
				1677	120383
				1678	120485
				1679	120592
				1680	120695
				1681	120795
				1682	120894
				1683	120996
				1684	121100
				1685	121210
				1686	121315
				1687	121416
				1688	121515
				1689	121617
				1690	121721
				1691	121830
				1692	121932
				1693	122033
				1694	122134
				1695	122233
				1696	122348
				1697	122456
				1698	122562
				1699	122665
				1700	122767
				1701	122871
				1702	122972
				1703	123069
				1704	123174
				1705	123281
				1706	123385
				1707	123487
				1708	123589
				1709	123690
				1710	123794
				1711	123899
				1712	124003
				1713	124112
				1714	124215
				1715	124320
				1716	124425
				1717	124531
				1718	124635
				1719	124740
				1720	124851
				1721	124959
				1722	125065
				1723	125167
				1724	125274
				1725	125384
				1726	125491
				1727	125599
				1728	125709
				1729	125820
				1730	125930
				1731	126037
				1732	126139
				1733	126250
				1734	126363
				1735	126474
				1736	126582
				1737	126680
				1738	126772
				1739	126863
				1740	126948
				1741	127034
				1742	127123
				1743	127211
				1744	127297
				1745	127383
				1746	127459
				1747	127541
				1748	127624
				1749	127705
				1750	127787
				1751	127870
				1752	127953
				1753	128036
				1754	128120
				1755	128202
				1756	128285
				1757	128373
				1758	128456
				1759	128539
				1760	128623
				1761	128701
				1762	128788
				1763	128870
				1764	128954
				1765	129039
				1766	129121
				1767	129205
				1768	129288
				1769	129373
				1770	129456
				1771	129541
				1772	129622
				1773	129707
				1774	129790
				1775	129873
				1776	129958
				1777	130044
				1778	130129
				1779	130216
				1780	130308
				1781	130397
				1782	130489
				1783	130588
				1784	130684
				1785	130784
				1786	130883
				1787	130984
				1788	131090
				1789	131201
				1790	131312
				1791	131420
				1792	131537
				1793	131665
				1794	131793
				1795	131928
				1796	132068
				1797	132203
				1798	132339
				1799	132484
				1800	132632
				1801	132782
				1802	132933
				1803	133078
				1804	133229
				1805	133393
				1806	133543
				1807	133695
				1808	133856
				1809	134018
				1810	134176
				1811	134333
				1812	134489
				1813	134652
				1814	134826
				1815	134997
				1816	135183
				1817	135351
				1818	135514
				1819	135674
				1820	135855
				1821	136023
				1822	136205
				1823	136385
				1824	136562
				1825	136737
				1826	136906
				1827	137098
				1828	137283
				1829	137455
				1830	137638
				1831	137810
				1832	137996
				1833	138178
				1834	138359
				1835	138542
				1836	138721
				1837	138911
				1838	139107
				1839	139294
				1840	139482
				1841	139665
				1842	139855
				1843	140038
				1844	140227
				1845	140412
				1846	140587
				1847	140763
				1848	140947
				1849	141135
				1850	141334
				1851	141547
				1852	141762
				1853	141972
				1854	142192
				1855	142418
				1856	142627
				1857	142840
				1858	143050
				1859	143267
				1860	143476
				1861	143667
				1862	143860
				1863	144059
				1864	144257
				1865	144443
				1866	144630
				1867	144825
				1868	145017
				1869	145210
				1870	145403
				1871	145580
				1872	145781
				1873	145985
				1874	146179
				1875	146378
				1876	146567
				1877	146760
				1878	146958
				1879	147140
				1880	147330
				1881	147527
				1882	147723
				1883	147906
				1884	148088
				1885	148267
				1886	148450
				1887	148637
				1888	148815
				1889	148982
				1890	149166
				1891	149357
				1892	149539
				1893	149727
				1894	149921
				1895	150103
				1896	150285
				1897	150477
				1898	150667
				1899	150844
				1900	151025
				1901	151206
				1902	151386
				1903	151568
				1904	151747
				1905	151921
				1906	152101
				1907	152284
				1908	152469
				1909	152658
				1910	152849
				1911	153037
				1912	153234
				1913	153432
				1914	153644
				1915	153842
				1916	154045
				1917	154242
				1918	154441
				1919	154646
				1920	154864
				1921	155082
				1922	155298
				1923	155517
				1924	155743
				1925	155975
				1926	156207
				1927	156433
				1928	156651
				1929	156885
				1930	157111
				1931	157332
				1932	157554
				1933	157780
				1934	158005
				1935	158235
				1936	158459
				1937	158670
				1938	158862
				1939	159056
				1940	159267
				1941	159497
				1942	159724
				1943	159956
				1944	160179
				1945	160405
				1946	160645
				1947	160879
				1948	161125
				1949	161379
				1950	161615
				1951	161841
				1952	162067
				1953	162282
				1954	162492
				1955	162694
				1956	162901
				1957	163117
				1958	163334
				1959	163552
				1960	163774
				1961	163996
				1962	164224
				1963	164449
				1964	164678
				1965	164906
				1966	165126
				1967	165356
				1968	165568
				1969	165790
				1970	165996
				1971	166209
				1972	166426
				1973	166647
				1974	166871
				1975	167075
				1976	167288
				1977	167493
				1978	167700
				1979	167907
				1980	168102
				1981	168285
				1982	168469
				1983	168663
				1984	168864
				1985	169056
				1986	169253
				1987	169439
				1988	169645
[truncated: 1,040 more rows]

## Sheet: EDC3 on Vostok
Synchronisation of the EDC and Vostok ice cores, and resulting EDC3 age scale on Vostok.
Pointers come from isotopic records (Petit et al., Nature, 1999; Watanabe et al., Nature, 2003) synchronisation and volcanic synchronisation (Narcisi et al., EPSL, 2006)..
The isotopic records have been resampled every 100 yr, and then smoothed with a 3 pts running average.
A marker has been putted in general every peak, matching as a whole the maximums and the mid-transitions of the peak.
When peaks were not present (as during the termination), transitions were used.
The Vostok depth refers to the same composite depth used in Petit et al. (1999), that is to say the 3G and 4G depth, and the 5G depth corrected by 3.41 m.
The EDC depth refers to the same composite depth used in Parrenin et al. (Climate of the Past, 2007), that is to say the EDC96 and EDC99 depths (uncorrected).
To obtain Vostok record on the EDC3 time scale, synchronisation pointers were linearly interpolated every meter via age scales (EDC3 for EDC and VK-FGT1 for Vostok).
Pointers				EDC3 on Vostok
type	Vostok depth	EDC depth		depth Vostok	age EDC3 (yr BP)
standard	0	0		0	-50
Isotopic	262.6	363		1	-32.7759
Isotopic	309.8	417.1		2	-15.5517
Isotopic	350	466		3	2.68559
Isotopic	446.1	583		4	20.9229
Isotopic	466.9	606.5		5	40.1734
Isotopic	499.3	637.3		6	58.4107
Isotopic	520	655		7	78.6744
Isotopic	539	670		8	98.9381
Isotopic	570.3	701.2		9	119.202
Isotopic	595.8	727.9		10	139.465
Isotopic	609	741.8		11	159.729
Isotopic	625.5	760		12	184.046
Isotopic	648.9	785		13	207.349
Isotopic	677.9	812		14	231.665
Isotopic	774.4	881		15	253.955
Isotopic	798	897.5		16	277.259
Isotopic	849.6	941		17	301.575
Isotopic	922.8	996.7		18	324.878
Isotopic	979.9	1039.5		19	347.168
Isotopic	1009.5	1060.3		20	370.472
Isotopic	1065.8	1101.3		21	393.775
Isotopic	1242.7	1243		22	419.104
Isotopic	1444.6	1408.3		23	445.447
Isotopic	1465	1425		24	473.816
Isotopic	1485.7	1442		25	503.199
Isotopic	1553.2	1479.5		26	532.581
Isotopic	1586.8	1497.8		27	561.963
Isotopic	1624.1	1531.9		28	589.319
Isotopic	1791.4	1663		29	617.689
Isotopic	1830	1693		30	647.071
Isotopic	1855	1712		31	679.493
Isotopic	1880	1730		32	711.915
Isotopic	1900	1742		33	742.31
Isotopic	1925	1762		34	772.706
Isotopic	1957.6	1782.8		35	804.114
Isotopic	2040	1826		36	836.536
Isotopic	2147.4	1888.6		37	867.945
Isotopic	2176.5	1905.5		38	900.367
Isotopic	2234.8	1934		39	932.789
Isotopic	2276.1	1953		40	966.224
Isotopic	2301.3	1966		41	999.659
Isotopic	2326.3	1981		42	1031.07
Isotopic	2403	2025.3		43	1065.52
Isotopic	2418	2036		44	1100.98
Isotopic	2433	2047		45	1135.43
Isotopic	2466	2067		46	1169.87
Volcanic	2501.9	2086.6		47	1207.36
Isotopic	2522.3	2100.3		48	1246.88
Volcanic	2586.2	2150.9		49	1284.36
Isotopic	2625	2177.2		50	1318.81
Isotopic	2644	2191		51	1354.27
Isotopic	2662.3	2208.7		52	1389.74
Isotopic	2678.1	2222.2		53	1425.2
Isotopic	2693.2	2235		54	1461.67
Isotopic	2751.7	2287.4		55	1500.17
Isotopic	2772	2306.4		56	1539.69
Isotopic	2790.2	2322.2		57	1580.21
Isotopic	2802.2	2332.2		58	1621.75
Isotopic	2810.9	2339.7		59	1662.28
Isotopic	2826.6	2353.1		60	1702.81
Isotopic	2836	2360.8		61	1744.35
Isotopic	2846	2368.8		62	1785.89
Isotopic	2884.1	2400.2		63	1828.44
Isotopic	2890	2405		64	1868.97
Isotopic	2898.9	2411.9		65	1908.49
Isotopic	2936.5	2441.3		66	1946.99
Isotopic	2952.8	2453.3		67	1987.51
Isotopic	2961.4	2458.7		68	2028.04
Isotopic	2978.9	2470		69	2068.57
Isotopic	2996.8	2483.5		70	2110.11
Isotopic	3010.2	2493.5		71	2152.66
Isotopic	3037	2513.3		72	2196.23
Isotopic	3046.6	2520.8		73	2237.77
Isotopic	3103.1	2566.7		74	2275.26
Isotopic	3128.9	2588.9		75	2315.79
Isotopic	3145.2	2601.3		76	2361.38
Isotopic	3177	2625		77	2405.96
Isotopic	3213.7	2656		78	2449.53
Isotopic	3229.7	2672.8		79	2492.08
Isotopic	3241	2683.6		80	2533.62
Isotopic	3258.2	2693.5		81	2578.2
Isotopic	3310	2754		82	2622.78
				83	2665.33
				84	2709.91
				85	2758.55
				86	2806.17
				87	2848.72
				88	2891.27
				89	2937.88
				90	2986.51
				91	3034.13
				92	3079.73
				93	3124.31
				94	3169.9
				95	3213.47
				96	3259.06
				97	3305.67
				98	3351.26
				99	3396.85
				100	3442.45
				101	3486.01
				102	3533.63
				103	3582.27
				104	3628.87
				105	3672.44
				106	3716.01
				107	3760.59
				108	3808.21
				109	3855.83
				110	3903.45
				111	3950.05
				112	3998.69
				113	4048.33
				114	4096.96
				115	4147.62
				116	4198.28
				117	4249.95
				118	4299.6
				119	4347.22
				120	4390.79
				121	4434.35
				122	4477.92
				123	4520.47
				124	4564.04
				125	4608.62
				126	4654.22
				127	4701.84
				128	4752.49
				129	4803.15
				130	4851.79
				131	4899.41
				132	4950.07
				133	5001.74
				134	5052.4
				135	5102.04
				136	5151.69
				137	5199.31
				138	5247.94
				139	5298.6
				140	5346.22
				141	5394.85
				142	5442.47
				143	5490.09
				144	5536.7
				145	5584.32
				146	5632.95
				147	5681.58
				148	5730.22
				149	5778.85
				150	5828.5
				151	5878.14
				152	5928.8
				153	5977.43
				154	6025.05
				155	6073.69
				156	6125.36
				157	6176.02
				158	6225.66
				159	6274.3
				160	6324.96
				161	6374.6
				162	6423.24
				163	6472.88
				164	6527.59
				165	6582.31
				166	6634.99
				167	6686.66
				168	6739.35
				169	6788.99
				170	6837.63
				171	6887.27
				172	6938.95
				173	6993.66
				174	7048.37
				175	7102.07
				176	7154.75
				177	7208.45
				178	7263.17
				179	7316.86
				180	7368.54
				181	7418.18
				182	7468.84
				183	7519.5
				184	7572.19
				185	7624.87
				186	7676.54
				187	7727.2
				188	7776.85
				189	7825.48
				190	7876.14
				191	7926.8
				192	7978.47
				193	8032.17
				194	8085.87
				195	8139.57
				196	8194.28
				197	8246.97
				198	8300.67
				199	8351.33
				200	8397.93
				201	8442.51
				202	8494.18
				203	8548.9
				204	8602.6
				205	8654.27
				206	8705.94
				207	8758.63
				208	8812.32
				209	8866.02
				210	8919.72
				211	8973.42
				212	9024.08
				213	9074.74
				214	9126.41
				215	9181.12
				216	9233.81
				217	9287.51
				218	9342.22
				219	9394.91
				220	9447.59
				221	9501.29
				222	9553.98
				223	9604.63
				224	9655.29
				225	9706.97
				226	9760.66
				227	9815.38
				228	9868.06
				229	9919.73
				230	9970.39
				231	10020
				232	10070.7
				233	10124.4
				234	10179.1
				235	10233.8
				236	10287.5
				237	10340.2
				238	10393.9
				239	10447.6
				240	10500.3
				241	10554
				242	10605.7
				243	10655.3
				244	10706
				245	10760.7
				246	10817.4
				247	10872.1
				248	10925.8
				249	10980.5
				250	11036.3
				251	11091
				252	11146.7
				253	11202.4
				254	11256.1
				255	11308.8
				256	11362.5
				257	11416.2
				258	11467.9
				259	11520.6
				260	11573.3
				261	11623.9
				262	11674.6
				263	11719.4
				264	11759.5
				265	11802.8
				266	11846
				267	11889.3
				268	11934.3
				269	11980.8
				270	12028.2
				271	12075.6
				272	12123
				273	12171.2
				274	12221
				275	12271.6
				276	12323.9
				277	12376.2
				278	12426.8
				279	12479.1
				280	12532.2
				281	12586.1
				282	12639.2
				283	12694.8
				284	12753.6
				285	12812.4
				286	12870.4
				287	12927.6
				288	12986.4
				289	13046
				290	13104.8
				291	13162.8
				292	13218.4
				293	13273.9
				294	13330.3
				295	13387.4
				296	13444.6
				297	13502.6
				298	13560.6
				299	13617
				300	13672.5
				301	13728.1
				302	13784.4
				303	13843.2
				304	13902.9
				305	13960.9
				306	14016.4
				307	14071.1
				308	14123.4
				309	14173.3
				310	14224.8
				311	14279.9
				312	14335
				313	14391
				314	14447.8
				315	14506.5
				316	14566.9
				317	14628.2
				318	14690.4
				319	14754.4
				320	14817.5
				321	14880.6
				322	14944.6
				323	15009.4
				324	15073.4
				325	15137.4
				326	15203.2
				327	15269.8
				328	15337.3
				329	15404
				330	15473.3
				331	15545.3
				332	15616.4
				333	15684.8
				334	15753.2
				335	15822.5
				336	15894.5
				337	15968.3
				338	16040.2
				339	16113.1
				340	16185.1
				341	16257.1
				342	16330.8
				343	16407.2
				344	16481.9
				345	16557.4
				346	16633.8
				347	16712.9
				348	16794.7
				349	16875.5
				350	16957.3
				351	17051.7
				352	17148.3
				353	17245.9
				354	17346.6
				355	17451.5
				356	17561.7
				357	17669.8
				358	17774.8
				359	17876.5
				360	17978.3
				361	18082.2
				362	18189.3
				363	18295.2
				364	18399.1
				365	18503
				366	18606.9
				367	18710.8
				368	18814.7
				369	18920.7
				370	19029.8
				371	19140
				372	19246
				373	19349.9
				374	19454.8
				375	19561.8
				376	19672
				377	19784.3
				378	19895.5
				379	20001.5
				380	20103.3
				381	20208.3
				382	20315.3
				383	20422.3
				384	20527.3
				385	20630.1
				386	20731.9
				387	20836.8
				388	20946
				389	21056.2
				390	21168.4
				391	21278.6
				392	21387.8
				393	21491.7
				394	21594.5
				395	21697.3
				396	21799.1
				397	21904.1
				398	22011.1
				399	22117.1
				400	22223.1
				401	22328
				402	22432.9
				403	22536.8
				404	22642.8
				405	22748.8
				406	22853.8
				407	22958.7
				408	23062.6
				409	23167.5
				410	23272.5
				411	23376.3
				412	23477.1
				413	23577.8
				414	23681.7
				415	23789.8
				416	23895.8
				417	24001.8
				418	24108.8
				419	24219
				420	24331.3
				421	24441.5
				422	24549.5
				423	24656.6
				424	24764.7
				425	24872.8
				426	24981.9
				427	25088.9
				428	25191.8
				429	25297.8
				430	25407.9
				431	25519.2
				432	25632.5
				433	25743.7
				434	25848.7
				435	25951.5
				436	26058.6
				437	26167.7
				438	26277.9
				439	26386
				440	26492
				441	26596.9
				442	26699.7
				443	26804.7
				444	26918
				445	27029.2
				446	27132.1
				447	27232.2
				448	27332.5
				449	27431.7
				450	27528.7
				451	27626.9
				452	27729.3
				453	27833.8
				454	27937.3
				455	28039.7
				456	28142.1
				457	28246.7
				458	28352.3
				459	28455.8
				460	28553.9
				461	28648.8
				462	28744.9
				463	28843
				464	28941.1
				465	29039.3
				466	29137.4
				467	29231.9
				468	29314.9
				469	29400.5
				470	29487
				471	29574.5
				472	29662.8
				473	29749.3
				474	29833.1
				475	29918.8
				476	30008
				477	30101.7
				478	30196.4
				479	30291
				480	30383
				481	30473.1
				482	30559.6
				483	30647.1
				484	30737.2
				485	30828.2
				486	30918.4
				487	31005.8
				488	31092.3
				489	31177.1
				490	31260.9
				491	31345.6
				492	31435.7
				493	31526.8
				494	31616
				495	31701.6
				496	31784.6
				497	31864.8
				498	31943.2
				499	32019.8
				500	32094
				501	32167.1
				502	32242
				503	32318.4
				504	32397.4
				505	32478.1
				506	32559.5
				507	32641
				508	32723.3
				509	32805.6
				510	32887.1
				511	32966
				512	33041.7
				513	33114.9
				514	33188.8
				515	33265.3
				516	33342.6
				517	33419.1
				518	33494.8
				519	33569.6
				520	33643.6
				521	33717
				522	33792.1
				523	33868.8
				524	33945.5
				525	34022.2
				526	34096.4
				527	34171.5
				528	34247.3
				529	34324.9
				530	34401.6
				531	34475.8
				532	34546.8
				533	34617
				534	34685.5
				535	34753.2
				536	34823.4
				537	34893.5
				538	34962.9
				539	35032.2
				540	35123.6
				541	35214.9
				542	35303.1
				543	35390.2
				544	35479.5
				545	35572.9
				546	35665.3
				547	35757.7
				548	35852.2
				549	35945.6
				550	36038
				551	36129.3
				552	36219.6
				553	36313.1
				554	36404.4
				555	36495.7
				556	36585
				557	36676.3
				558	36766.6
				559	36853.7
				560	36940.9
				561	37027
				562	37112
				563	37196
				564	37280
				565	37360.8
				566	37442.7
				567	37523.5
				568	37602.3
				569	37680
				570	37753.4
				571	37832.4
				572	37916.1
				573	38004.5
				574	38092.8
				575	38181.1
				576	38267.1
				577	38350.8
				578	38434.5
				579	38519.4
				580	38605.4
				581	38690.2
				582	38775.1
				583	38862.2
				584	38948.3
				585	39036.6
				586	39128.4
				587	39221.4
				588	39316.7
				589	39413.2
				590	39514.3
				591	39614.3
				592	39710.7
				593	39804.9
				594	39899
				595	39989.7
				596	40080.1
				597	40176.8
				598	40274.6
				599	40374.9
				600	40474
				601	40574.3
				602	40675.9
				603	40776.2
				604	40871.6
				605	40965.8
				606	41062.4
				607	41161.5
				608	41256.9
				609	41352.3
				610	41453.8
				611	41556.5
				612	41660.5
				613	41765.9
				614	41872.5
				615	41979.1
				616	42087.1
				617	42195
				618	42299
				619	42403.1
				620	42505.8
				621	42608.5
				622	42711.3
				623	42811.4
				624	42908.9
				625	43006.5
				626	43102.9
				627	43199.6
				628	43296.3
				629	43393
				630	43488.4
				631	43583.9
				632	43675.5
				633	43769.6
				634	43868.8
				635	43971.9
				636	44074.9
				637	44179.3
				638	44279.8
				639	44377.7
				640	44478.2
				641	44578.8
				642	44679.3
				643	44778.5
				644	44877.7
				645	44971.9
				646	45064.8
				647	45158.9
				648	45256.9
				649	45352
				650	45427.3
				651	45500.6
				652	45572.8
				653	45644.9
				654	45718.2
				655	45791.4
				656	45860.4
				657	45931.6
				658	46002.7
				659	46072.8
				660	46144.9
				661	46219.3
				662	46293.6
				663	46363.6
				664	46434.8
				665	46510.1
				666	46584.4
				667	46658.7
				668	46733.1
				669	46808.4
				670	46884.9
				671	46963.4
				672	47040.9
				673	47117.3
				674	47194.8
				675	47270.2
				676	47344.5
				677	47419.9
				678	47497.8
				679	47557.8
				680	47616.1
				681	47677
				682	47741.1
				683	47805.3
				684	47869.5
				685	47935.3
				686	48000.3
				687	48065.3
				688	48131.9
				689	48198.6
				690	48264.4
				691	48331.9
				692	48399.4
				693	48463.6
				694	48526.1
				695	48591.9
				696	48658.6
				697	48723.6
				698	48787.7
				699	48851.9
				700	48917.7
				701	48988.6
				702	49060.2
				703	49130.2
				704	49201.1
				705	49270.2
				706	49336
				707	49400.2
				708	49465.2
				709	49531
				710	49597.7
				711	49665.2
				712	49733.5
				713	49801.9
				714	49869.4
				715	49934.4
				716	49998.5
				717	50063.5
				718	50127.7
				719	50191
				720	50255.2
				721	50319.3
				722	50381.8
				723	50441.8
				724	50502.7
				725	50564.3
				726	50627.7
				727	50691.8
				728	50756
				729	50819.3
				730	50881
				731	50943.5
				732	51007.6
				733	51071
				734	51133.5
				735	51196.8
				736	51257.6
				737	51317.6
				738	51376.8
				739	51435.1
				740	51495.1
				741	51556.8
				742	51618.4
				743	51680.9
				744	51741.8
				745	51801.8
				746	51860.1
				747	51918.4
				748	51976.8
				749	52033.4
				750	52091.8
				751	52150.9
				752	52210.9
				753	52270.1
				754	52326.7
				755	52383.4
				756	52440.9
				757	52497.6
				758	52552.6
				759	52608.4
				760	52665.9
				761	52722.6
				762	52779.2
				763	52836.7
				764	52894.2
				765	52950.9
				766	53007.5
				767	53064.2
				768	53122.5
				769	53182.5
				770	53240.9
				771	53296.7
				772	53347.5
				773	53398.4
				774	53451.7
				775	53508.4
				776	53567.8
				777	53628.8
				778	53690.6
				779	53749.9
				780	53806.7
				781	53865.2
				782	53923.7
				783	53980.5
				784	54038.2
				785	54096.7
				786	54154.3
				787	54210.3
				788	54265.5
				789	54323.9
				790	54384.1
				791	54445.9
				792	54507.8
				793	54567.1
				794	54628.9
				795	54694.1
				796	54759.3
				797	54821.9
				798	54881.3
				799	54953.1
				800	55025.9
				801	55103
				802	55182.2
				803	55260.3
				804	55337.4
				805	55412.4
				806	55489.4
				807	55565.5
				808	55642.5
				809	55722.8
				810	55804.1
				811	55883.3
				812	55961.4
				813	56040.6
				814	56117.7
				815	56193.7
				816	56270.8
				817	56347.9
				818	56426
				819	56503.1
				820	56580.2
				821	56653
				822	56724.8
				823	56796.6
				824	56867.4
				825	56938.1
				826	57008.9
				827	57079.6
				828	57152.4
				829	57224.2
				830	57292.9
				831	57360.5
				832	57429.1
				833	57496.7
				834	57564.2
				835	57632.9
				836	57700.4
				837	57769.1
				838	57837.7
				839	57904.2
				840	57969.7
				841	58036.2
				842	58102.7
				843	58166.1
				844	58227.3
				845	58289.6
				846	58355.1
				847	58420.6
				848	58486
				849	58549.4
				850	58611.6
				851	58673.4
				852	58735.2
				853	58799.9
				854	58866.6
				855	58929.4
				856	58991.2
				857	59052
				858	59112.9
				859	59174.7
				860	59236.5
				861	59297.4
				862	59356.3
				863	59416.2
				864	59478.9
				865	59544.6
				866	59611.3
				867	59678.9
				868	59747.5
				869	59815.1
				870	59882.7
				871	59952.2
				872	60022.7
				873	60091.3
				874	60158.9
				875	60226.5
				876	60295.1
				877	60360.8
				878	60426.5
				879	60492.1
				880	60558.8
				881	60627.4
				882	60698.8
				883	60769.3
				884	60837.9
				885	60907.5
				886	60977
				887	61047.5
				888	61118
				889	61188.5
				890	61260
				891	61331.5
				892	61405.9
				893	61483.1
				894	61558.5
				895	61631.9
				896	61704.3
				897	61776.8
				898	61851.1
				899	61924.5
				900	61999.9
				901	62074.2
				902	62146.7
				903	62218.2
				904	62291.6
				905	62365.9
				906	62441.3
				907	62517.6
				908	62595.8
				909	62674.1
				910	62755.2
				911	62836.3
				912	62916.5
				913	62994.7
				914	63073
				915	63151.2
				916	63228.5
				917	63306.7
				918	63383
				919	63456.4
				920	63526.9
				921	63598.4
				922	63671.8
				923	63744
				924	63820
				925	63897.1
				926	63974.1
				927	64051.2
				928	64130.2
				929	64212.4
				930	64294.5
				931	64376.6
				932	64459.7
				933	64542.9
				934	64624
				935	64708.1
				936	64793.3
				937	64878.4
				938	64964.6
				939	65050.8
				940	65134.9
				941	65217.1
				942	65298.2
				943	65381.3
				944	65466.5
				945	65555.7
				946	65643.9
				947	65726
				948	65810.1
				949	65898.3
				950	65985.5
				951	66068.7
				952	66147.7
				953	66226.8
				954	66307.9
				955	66392.1
				956	66475.2
				957	66558.3
				958	66641.5
				959	66722.6
				960	66803.7
				961	66885.8
				962	66968.9
				963	67052.1
				964	67136.2
				965	67220.4
				966	67306.5
				967	67393.7
				968	67478.9
				969	67563
				970	67646.2
				971	67733.4
				972	67818.5
				973	67901.7
				974	67985.8
				975	68071
				976	68158.1
				977	68243.3
				978	68322.4
				979	68395.4
				980	68467.2
				981	68536.9
				982	68606.6
				983	68679.3
				984	68754.9
				985	68834.6
				986	68915.2
				987	68993.9
				988	69069.5
				989	69145.2
				990	69222.8
				991	69304.4
				992	69388.1
				993	69467.7
				994	69546.4
				995	69625
				996	69701.7
				997	69773.3
				998	69843
				999	69912.7
				1000	69981.4
				1001	70051.1
				1002	70120.8
				1003	70190.4
				1004	70260.1
				1005	70331.8
				1006	70401.5
				1007	70468.2
				1008	70533.9
				1009	70598.6
				1010	70665.4
				1011	70728.5
				1012	70793.5
				1013	70861.3
				1014	70930.2
				1015	70997.1
				1016	71064
				1017	71131.9
				1018	71200.8
				1019	71270.6
				1020	71343.4
				1021	71417.1
				1022	71490.8
				1023	71563.5
				1024	71635.3
				1025	71703.2
				1026	71770.1
				1027	71839
				1028	71909.8
				1029	71982.5
				1030	72057.2
				1031	72135.8
				1032	72215.3
				1033	72288
				1034	72359.8
				1035	72435.5
				1036	72512.1
				1037	72585.8
				1038	72658.5
				1039	72734.2
				1040	72808.9
				1041	72879.7
				1042	72948.5
				1043	73013.5
				1044	73080.4
				1045	73153.2
				1046	73225.9
				1047	73294.8
				1048	73363.6
				1049	73431.5
				1050	73499.4
				1051	73566.4
				1052	73634.2
				1053	73700.2
				1054	73766.1
				1055	73832.1
				1056	73898.1
				1057	73962.1
				1058	74024.1
				1059	74086.2
				1060	74147.3
				1061	74211.3
				1062	74277.3
				1063	74341.3
				1064	74405.3
				1065	74469.3
				1066	74531
				1067	74601
				1068	74673.1
				1069	74746.4
				1070	74820.8
				1071	74894
				1072	74966.2
				1073	75038.4
				1074	75112.8
				1075	75189.3
				1076	75264.8
				1077	75341.3
				1078	75422.2
				1079	75505.3
				1080	75591.7
				1081	75677
				1082	75758
				1083	75836.7
				1084	75914.3
				1085	75995.3
				1086	76078.4
				1087	76161.5
				1088	76247.9
				1089	76333.2
				1090	76405.3
				1091	76477.5
				1092	76558.4
				1093	76641.6
				1094	76722.5
				1095	76804.5
				1096	76883.2
				1097	76962
				1098	77041.8
				1099	77122.7
				1100	77198.2
				1101	77270.4
				1102	77342.5
				1103	77415.8
				1104	77485.8
				1105	77559.1
				1106	77635.6
				1107	77711.1
				1108	77784.3
				1109	77858.7
				1110	77934.2
				1111	78009.6
				1112	78078.5
				1113	78147.4
				1114	78225
				1115	78307.1
				1116	78388
				1117	78467.8
				1118	78541.1
				1119	78611.1
				1120	78680
				1121	78751
				1122	78823.2
				1123	78894.3
				1124	78965.4
				1125	79037.6
				1126	79111.9
				1127	79183
				1128	79249.7
				1129	79314.2
				1130	79383.1
				1131	79452
				1132	79517.6
				1133	79582.2
				1134	79648.9
				1135	79715.6
				1136	79782.3
				1137	79849
				1138	79914.6
				1139	79981.3
				1140	80045.8
				1141	80110.3
				1142	80171.6
				1143	80233.9
				1144	80302.8
				1145	80375
				1146	80446.1
				1147	80516.1
				1148	80588.2
				1149	80659.3
				1150	80727.1
				1151	80791.6
				1152	80852.9
				1153	80914.1
				1154	80975.4
				1155	81037.7
				1156	81104.4
				1157	81172.2
				1158	81238.9
				1159	81306.7
				1160	81372.3
				1161	81437.9
				1162	81504.6
				1163	81572.4
				1164	81638.1
				1165	81701.5
				1166	81766
				1167	81833.8
				1168	81904.9
				1169	81976
				1170	82044.9
				1171	82112.7
				1172	82180.5
				1173	82248.3
				1174	82316.1
				1175	82379.5
				1176	82437.4
				1177	82495.4
				1178	82557.7
				1179	82621.2
				1180	82686.8
				1181	82751.3
				1182	82814.7
				1183	82877.1
				1184	82937.2
				1185	82998.4
				1186	83060.8
				1187	83125.3
				1188	83187.6
				1189	83248.9
				1190	83309
				1191	83369.2
				1192	83429.3
				1193	83491.6
				1194	83556.2
				1195	83621.8
				1196	83687.4
				1197	83753
				1198	83818.6
				1199	83883.1
				1200	83948.8
				1201	84014.4
				1202	84081.1
				1203	84147.8
				1204	84214.5
				1205	84282.3
				1206	84352.3
				1207	84424.5
				1208	84495.5
				1209	84565.5
				1210	84635.5
				1211	84705.5
				1212	84775.5
				1213	84846.6
				1214	84917.7
				1215	84989.8
				1216	85058.7
				1217	85126.5
				1218	85194.3
				1219	85266.5
				1220	85338.7
				1221	85408.7
				1222	85478.6
				1223	85550.8
				1224	85621.9
				1225	85691.9
				1226	85763
				1227	85835.2
				1228	85908.4
				1229	85983.9
				1230	86060.4
				1231	86137
				1232	86213.5
				1233	86289
				1234	86365.5
				1235	86442.1
				1236	86518.6
				1237	86594.1
				1238	86669.5
				1239	86742.8
				1240	86812.8
				1241	86882.8
				1242	86955
				1243	87031.8
				1244	87112.9
				1245	87197.5
				1246	87282
				1247	87363.1
				1248	87443.1
				1249	87525.4
				1250	87609.9
				1251	87693.4
				1252	87776.8
				1253	87856.7
				1254	87939
				1255	88028.2
				1256	88119.8
				1257	88205.5
				1258	88290.1
				1259	88375.8
				1260	88462.7
				1261	88547.3
				1262	88629.6
				1263	88708.4
				1264	88787.1
				1265	88868.2
				1266	88949.4
				1267	89030.5
				1268	89112.7
				1269	89196.2
				1270	89281.9
				1271	89368.8
				1272	89452.2
				1273	89528.7
				1274	89601.7
				1275	89675.8
				1276	89751.2
				1277	89826.5
				1278	89904.1
				1279	89984
				1280	90064
				1281	90143.9
				1282	90226.2
				1283	90308.5
				1284	90388.4
				1285	90464.9
				1286	90541.4
				1287	90620.2
				1288	90702.4
				1289	90785.8
				1290	90868.1
				1291	90943.4
				1292	91018.7
				1293	91096.4
				1294	91175.2
				1295	91251.6
				1296	91330.4
				1297	91411.5
				1298	91494.9
				1299	91574.9
				1300	91654.8
				1301	91734.8
				1302	91815.9
				1303	91900.5
				1304	91985.1
				1305	92065
				1306	92140.3
				1307	92213.3
				1308	92285.2
				1309	92358.1
				1310	92432.3
				1311	92512.3
				1312	92595.7
				1313	92677.9
				1314	92759
				1315	92834.4
				1316	92909.7
				1317	92985
				1318	93063.8
				1319	93143.7
				1320	93222.5
				1321	93300.1
				1322	93376.6
				1323	93453.1
				1324	93531.9
				1325	93613
				1326	93696.4
				1327	93775.2
				1328	93850.5
				1329	93925.8
				1330	94003.5
				1331	94081.1
				1332	94158.7
				1333	94236.3
				1334	94312.8
				1335	94389.3
				1336	94464.6
				1337	94542.2
				1338	94621
				1339	94699.8
				1340	94776.3
				1341	94851.6
				1342	94928.1
				1343	95005.7
				1344	95084.5
				1345	95164.4
				1346	95245.5
				1347	95326.6
				1348	95405.4
				1349	95484.2
				1350	95566.5
				1351	95648.8
				1352	95731
				1353	95813.3
				1354	95897.9
				1355	95984.8
				1356	96068.2
				1357	96150.5
				1358	96236.2
				1359	96324.3
				1360	96410
				1361	96493.4
				1362	96571.1
				1363	96648.7
				1364	96729.8
				1365	96813.2
				1366	96900.1
				1367	96988.2
				1368	97071.6
				1369	97155
				1370	97239.6
				1371	97321.9
				1372	97400.7
				1373	97477.1
				1374	97553.6
				1375	97633.5
				1376	97715.8
				1377	97800.4
				1378	97883.8
				1379	97966.1
				1380	98046
				1381	98127.1
				1382	98209.4
				1383	98294
				1384	98376.3
				1385	98457.4
				1386	98538.5
				1387	98619.6
				1388	98700.7
				1389	98780.6
				1390	98861.7
				1391	98942.8
				1392	99021.6
				1393	99099.3
				1394	99178.1
				1395	99255.7
				1396	99333.3
				1397	99413.3
				1398	99494.4
				1399	99574.3
				1400	99651.9
				1401	99727.3
				1402	99804.9
				1403	99882.5
				1404	99962.5
				1405	100042
				1406	100121
				1407	100200
				1408	100279
				1409	100358
				1410	100436
				1411	100514
				1412	100590
				1413	100668
				1414	100743
				1415	100819
				1416	100893
				1417	100966
				1418	101041
				1419	101116
				1420	101189
				1421	101261
				1422	101333
				1423	101406
				1424	101478
				1425	101549
				1426	101619
				1427	101691
				1428	101765
				1429	101840
				1430	101914
				1431	101985
				1432	102057
				1433	102129
				1434	102204
				1435	102281
				1436	102359
				1437	102436
				1438	102510
				1439	102585
				1440	102663
				1441	102742
				1442	102819
				1443	102895
				1444	102975
				1445	103060
				1446	103148
				1447	103236
				1448	103327
				1449	103422
				1450	103516
				1451	103609
				1452	103703
				1453	103798
				1454	103891
				1455	103984
				1456	104075
				1457	104167
				1458	104259
				1459	104351
				1460	104444
				1461	104538
				1462	104632
				1463	104725
				1464	104819
				1465	104913
				1466	104996
				1467	105080
				1468	105165
				1469	105251
				1470	105340
				1471	105425
				1472	105510
				1473	105595
				1474	105679
				1475	105762
				1476	105848
				1477	105935
				1478	106021
				1479	106106
				1480	106187
				1481	106270
				1482	106352
				1483	106433
				1484	106513
				1485	106588
				1486	106658
				1487	106712
				1488	106768
				1489	106826
				1490	106883
				1491	106939
				1492	106996
				1493	107054
				1494	107113
				1495	107174
				1496	107234
				1497	107293
				1498	107351
				1499	107409
				1500	107467
				1501	107529
				1502	107594
				1503	107661
				1504	107731
				1505	107800
				1506	107870
				1507	107940
				1508	108012
				1509	108084
				1510	108157
				1511	108229
				1512	108302
				1513	108374
				1514	108445
				1515	108516
				1516	108588
				1517	108658
				1518	108728
				1519	108797
				1520	108866
				1521	108936
				1522	109005
				1523	109075
				1524	109147
				1525	109220
				1526	109292
				1527	109361
				1528	109430
				1529	109498
				1530	109568
				1531	109638
				1532	109706
				1533	109773
				1534	109838
				1535	109904
				1536	109971
				1537	110037
				1538	110103
				1539	110169
				1540	110235
				1541	110301
				1542	110368
				1543	110436
				1544	110507
				1545	110577
				1546	110648
				1547	110717
				1548	110785
				1549	110852
				1550	110920
				1551	110988
				1552	111055
				1553	111123
				1554	111188
				1555	111254
				1556	111321
				1557	111390
				1558	111458
				1559	111525
				1560	111591
				1561	111658
				1562	111724
				1563	111791
				1564	111857
				1565	111923
				1566	111989
				1567	112055
				1568	112120
				1569	112187
				1570	112254
				1571	112321
				1572	112386
				1573	112449
				1574	112511
				1575	112573
				1576	112634
				1577	112696
				1578	112757
				1579	112820
				1580	112885
				1581	112950
				1582	113011
				1583	113071
				1584	113131
				1585	113191
				1586	113250
				1587	113318
				1588	113416
				1589	113514
				1590	113614
				1591	113716
				1592	113820
				1593	113922
				1594	114022
				1595	114121
				1596	114216
				1597	114310
				1598	114404
				1599	114502
				1600	114598
				1601	114686
				1602	114772
				1603	114858
				1604	114942
				1605	115028
				1606	115114
				1607	115200
				1608	115287
				1609	115375
				1610	115468
				1611	115561
				1612	115653
				1613	115742
				1614	115831
				1615	115921
				1616	116010
				1617	116098
				1618	116186
				1619	116275
				1620	116363
				1621	116450
				1622	116538
				1623	116624
				1624	116710
				1625	116777
				1626	116844
				1627	116908
				1628	116972
				1629	117037
				1630	117102
				1631	117168
				1632	117233
				1633	117297
				1634	117364
				1635	117431
				1636	117493
				1637	117556
				1638	117621
				1639	117686
				1640	117752
				1641	117820
				1642	117886
				1643	117952
				1644	118017
				1645	118081
				1646	118143
				1647	118205
				1648	118268
				1649	118333
				1650	118398
				1651	118462
				1652	118525
				1653	118585
				1654	118646
				1655	118708
				1656	118772
				1657	118838
				1658	118903
				1659	118967
				1660	119030
				1661	119092
				1662	119153
				1663	119218
				1664	119283
				1665	119348
				1666	119414
				1667	119478
				1668	119542
				1669	119607
				1670	119671
				1671	119734
				1672	119796
				1673	119861
				1674	119928
				1675	119993
				1676	120057
				1677	120121
				1678	120186
				1679	120251
				1680	120315
				1681	120377
				1682	120441
				1683	120504
				1684	120566
				1685	120626
				1686	120685
				1687	120744
				1688	120803
				1689	120864
				1690	120925
				1691	120987
				1692	121049
				1693	121112
				1694	121175
				1695	121240
				1696	121303
				1697	121364
				1698	121424
				1699	121486
				1700	121549
				1701	121612
				1702	121674
				1703	121738
				1704	121799
				1705	121860
				1706	121920
				1707	121979
				1708	122037
				1709	122095
				1710	122152
				1711	122213
				1712	122273
				1713	122332
				1714	122391
				1715	122449
				1716	122506
				1717	122565
				1718	122625
				1719	122683
				1720	122742
				1721	122801
				1722	122860
				1723	122921
				1724	122984
				1725	123047
				1726	123107
				1727	123169
				1728	123230
				1729	123293
				1730	123354
				1731	123415
				1732	123474
				1733	123531
				1734	123586
				1735	123645
				1736	123704
				1737	123762
				1738	123821
				1739	123881
				1740	123939
				1741	123996
				1742	124053
				1743	124111
				1744	124168
				1745	124226
				1746	124283
				1747	124338
				1748	124394
				1749	124452
				1750	124508
				1751	124566
				1752	124625
				1753	124683
				1754	124740
				1755	124798
				1756	124856
				1757	124913
				1758	124970
				1759	125028
				1760	125085
				1761	125144
				1762	125203
				1763	125265
				1764	125324
				1765	125383
				1766	125441
				1767	125498
				1768	125552
				1769	125608
				1770	125665
				1771	125722
				1772	125779
				1773	125835
				1774	125889
				1775	125945
				1776	126004
				1777	126062
				1778	126120
				1779	126178
				1780	126236
				1781	126295
				1782	126353
				1783	126412
				1784	126472
				1785	126531
				1786	126588
				1787	126644
				1788	126700
				1789	126757
				1790	126812
				1791	126868
				1792	126922
				1793	126974
				1794	127024
				1795	127072
				1796	127122
				1797	127174
				1798	127226
				1799	127277
				1800	127328
				1801	127378
				1802	127429
				1803	127480
				1804	127530
				1805	127580
				1806	127629
				1807	127678
				1808	127727
				1809	127776
				1810	127826
				1811	127876
				1812	127924
				1813	127974
				1814	128023
				1815	128073
				1816	128121
				1817	128170
				1818	128220
				1819	128270
				1820	128320
				1821	128370
				1822	128418
				1823	128466
				1824	128514
				1825	128562
				1826	128611
				1827	128657
				1828	128704
				1829	128750
				1830	128797
				1831	128840
				1832	128884
				1833	128929
				1834	128975
				1835	129021
				1836	129067
				1837	129112
				1838	129158
				1839	129204
				1840	129252
				1841	129301
				1842	129349
				1843	129396
				1844	129442
				1845	129487
				1846	129531
				1847	129575
				1848	129623
				1849	129678
				1850	129731
				1851	129781
				1852	129828
				1853	129875
				1854	129921
				1855	129967
				1856	130015
				1857	130064
				1858	130114
				1859	130163
				1860	130211
				1861	130258
				1862	130306
				1863	130358
				1864	130409
				1865	130459
				1866	130512
				1867	130564
				1868	130616
				1869	130668
				1870	130722
				1871	130776
				1872	130831
				1873	130886
				1874	130943
				1875	130999
				1876	131056
				1877	131114
				1878	131171
				1879	131229
				1880	131284
				1881	131333
				1882	131383
				1883	131437
				1884	131492
				1885	131548
				1886	131602
				1887	131656
				1888	131710
				1889	131765
				1890	131821
				1891	131879
				1892	131936
				1893	131996
				1894	132056
				1895	132116
				1896	132174
				1897	132232
				1898	132291
				1899	132350
				1900	132409
				1901	132496
				1902	132585
				1903	132674
				1904	132767
				1905	132862
				1906	132958
				1907	133054
				1908	133150
				1909	133245
				1910	133342
				1911	133439
				1912	133533
				1913	133625
				1914	133719
				1915	133818
				1916	133920
				1917	134022
				1918	134127
				1919	134235
				1920	134344
				1921	134457
				1922	134572
				1923	134689
				1924	134805
				1925	134919
				1926	135020
				1927	135126
				1928	135235
				1929	135344
				1930	135453
				1931	135565
				1932	135678
				1933	135791
				1934	135901
				1935	136010
				1936	136119
				1937	136231
				1938	136342
				1939	136454
				1940	136567
				1941	136683
				1942	136798
				1943	136911
				1944	137026
				1945	137139
				1946	137252
				1947	137368
				1948	137485
				1949	137600
				1950	137715
				1951	137834
				1952	137952
				1953	138070
				1954	138185
				1955	138298
				1956	138413
				1957	138529
				1958	138642
				1959	138746
				1960	138854
				1961	138963
				1962	139068
				1963	139173
				1964	139278
				1965	139382
				1966	139486
				1967	139589
				1968	139690
				1969	139792
				1970	139894
				1971	139996
				1972	140100
				1973	140206
				1974	140311
				1975	140414
				1976	140517
				1977	140623
				1978	140729
				1979	140833
				1980	140935
				1981	141038
				1982	141141
				1983	141244
				1984	141345
				1985	141446
				1986	141551
				1987	141654
				1988	141755
				1989	141857
[truncated: 1,321 more rows]

## Sheet: EDC3 on LR04
Synchronisation of the EDC ice core with the LR04 stack, and EDC3 age scale for the LR04 stack.
Pointers come from a synchronisation between the EDC isotopic record (Jouzel et al., submitted) with the LR04 stack (Lisiecki and Raymo, 2005), assuming a 3 kyr phase lag for the marine record relative to EDC deuterium content.
The EDC depth refers to the same composite depth used in Parrenin et al. (Climate of the Past, submitted), that is to say the EDC96 and EDC99 depths (uncorrected).
To obtain the LR04 stack on the EDC3 time scale, synchronisation pointers were linearly interpolated.
Pointers			EDC3 on LR04
LR04 age (yr BP)	EDC3 age (yr BP)		age LR04 (yr BP)	age EDC3 (yr BP)
0	3000		0	0
13050	16050		1000	1000
81250	82300		2000	2000
105750	106900		3000	3000
131950	132800		4000	4000
198000	198150		5000	5000
215400	215500		6000	6000
227800	227900		7000	7000
243450	245600		8000	8000
286150	290450		9000	9000
312450	315900		10000	10000
335550	337900		11000	11000
424600	427250		12000	12000
490050	488000		13000	13000
512000	509750		14000	13972.8
533600	530400		15000	14944.2
580750	581900		16000	15915.7
622350	628100		17000	16887.1
714000	718750		18000	17858.5
743650	740550		19000	18829.9
795500	800150		20000	19801.3
			21000	20772.7
			22000	21744.1
			23000	22715.5
			24000	23686.9
			25000	24658.3
			26000	25629.7
			27000	26601.1
			28000	27572.5
			29000	28544
			30000	29515.4
			31000	30486.8
			32000	31458.2
			33000	32429.6
			34000	33401
			35000	34372.4
			36000	35343.8
			37000	36315.2
			38000	37286.6
			39000	38258
			40000	39229.4
			41000	40200.8
			42000	41172.3
			43000	42143.7
			44000	43115.1
			45000	44086.5
			46000	45057.9
			47000	46029.3
			48000	47000.7
			49000	47972.1
			50000	48943.5
			51000	49914.9
			52000	50886.3
			53000	51857.7
			54000	52829.1
			55000	53800.5
			56000	54772
			57000	55743.4
			58000	56714.8
			59000	57686.2
			60000	58657.6
			61000	59629
			62000	60600.4
			63000	61571.8
			64000	62543.2
			65000	63514.6
			66000	64486
			67000	65457.4
			68000	66428.8
			69000	67400.3
			70000	68371.7
			71000	69343.1
			72000	70314.5
			73000	71285.9
			74000	72257.3
			75000	73228.7
			76000	74200.1
			77000	75171.5
			78000	76142.9
			79000	77114.3
			80000	78085.7
			81000	79057.1
			82000	80053.1
			83000	81057.1
			84000	82061.2
			85000	83065.3
			86000	84069.4
			87000	85073.5
			88000	86077.6
			89000	87081.6
			90000	88085.7
			91000	89089.8
			92000	90093.9
			93000	91098
			94000	92102
			95000	93106.1
			96000	94110.2
			97000	95114.3
			98000	96118.4
			99000	97122.4
			100000	98126.5
			101000	99130.6
			102000	100135
			103000	101139
			104000	102143
			105000	103147
			106000	104147
			107000	105136
			108000	106124
			109000	107113
			110000	108101
			111000	109090
			112000	110078
			113000	111067
			114000	112056
			115000	113044
			116000	114033
			117000	115021
			118000	116010
			119000	116998
			120000	117987
			121000	118975
			122000	119964
			123000	120952
			124000	121941
			125000	122930
			126000	123918
			127000	124907
			128000	125895
			129000	126884
			130000	127872
			131000	128861
			132000	129849
			133000	130839
			134000	131828
			135000	132818
			136000	133807
			137000	134796
			138000	135786
			139000	136775
			140000	137765
			141000	138754
			142000	139743
			143000	140733
			144000	141722
			145000	142712
			146000	143701
			147000	144690
			148000	145680
			149000	146669
			150000	147659
			151000	148648
			152000	149638
			153000	150627
			154000	151616
			155000	152606
			156000	153595
			157000	154585
			158000	155574
			159000	156563
			160000	157553
			161000	158542
			162000	159532
			163000	160521
			164000	161510
			165000	162500
			166000	163489
			167000	164479
			168000	165468
			169000	166457
			170000	167447
			171000	168436
			172000	169426
			173000	170415
			174000	171404
			175000	172394
			176000	173383
			177000	174373
			178000	175362
			179000	176351
			180000	177341
			181000	178330
			182000	179320
			183000	180309
			184000	181298
			185000	182288
			186000	183277
			187000	184267
			188000	185256
			189000	186245
			190000	187235
			191000	188224
			192000	189214
			193000	190203
			194000	191192
			195000	192182
			196000	193171
			197000	194161
			198000	195150
			199000	196147
			200000	197144
			201000	198141
			202000	199139
			203000	200136
			204000	201133
			205000	202130
			206000	203127
			207000	204124
			208000	205121
			209000	206118
			210000	207116
			211000	208113
			212000	209110
			213000	210107
			214000	211104
			215000	212101
			216000	213100
			217000	214100
			218000	215100
			219000	216100
			220000	217100
			221000	218100
			222000	219100
			223000	220100
			224000	221100
			225000	222100
			226000	223100
			227000	224100
			228000	225126
			229000	226257
			230000	227388
			231000	228519
			232000	229650
			233000	230781
			234000	231912
			235000	233043
			236000	234174
			237000	235305
			238000	236436
			239000	237567
			240000	238698
			241000	239829
			242000	240960
			243000	242091
			244000	243178
			245000	244228
			246000	245278
			247000	246329
			248000	247379
			249000	248429
			250000	249480
			251000	250530
			252000	251581
			253000	252631
			254000	253681
			255000	254732
			256000	255782
			257000	256832
			258000	257883
			259000	258933
			260000	259983
			261000	261034
			262000	262084
			263000	263134
			264000	264185
			265000	265235
			266000	266285
			267000	267336
			268000	268386
			269000	269436
			270000	270487
			271000	271537
			272000	272588
			273000	273638
			274000	274688
			275000	275739
			276000	276789
			277000	277839
			278000	278890
			279000	279940
			280000	280990
			281000	282041
			282000	283091
			283000	284141
			284000	285192
			285000	286242
			286000	287292
			287000	288273
			288000	289240
			289000	290208
			290000	291176
			291000	292143
			292000	293111
			293000	294079
			294000	295046
			295000	296014
			296000	296982
			297000	297949
			298000	298917
			299000	299885
			300000	300852
			301000	301820
			302000	302788
			303000	303755
			304000	304723
			305000	305691
			306000	306658
			307000	307626
			308000	308594
			309000	309562
			310000	310529
			311000	311497
			312000	312465
			313000	313424
			314000	314376
			315000	315329
			316000	316281
			317000	317233
			318000	318186
			319000	319138
			320000	320090
			321000	321043
			322000	321995
			323000	322948
			324000	323900
			325000	324852
			326000	325805
			327000	326757
			328000	327710
			329000	328662
			330000	329614
			331000	330567
			332000	331519
			333000	332471
			334000	333424
			335000	334376
			336000	335352
			337000	336355
			338000	337358
			339000	338362
			340000	339365
			341000	340368
			342000	341372
			343000	342375
			344000	343378
			345000	344382
			346000	345385
			347000	346389
			348000	347392
			349000	348395
			350000	349399
			351000	350402
			352000	351405
			353000	352409
			354000	353412
			355000	354416
			356000	355419
			357000	356422
			358000	357426
			359000	358429
			360000	359432
			361000	360436
			362000	361439
			363000	362442
			364000	363446
			365000	364449
			366000	365453
			367000	366456
			368000	367459
			369000	368463
			370000	369466
			371000	370469
			372000	371473
			373000	372476
			374000	373480
			375000	374483
			376000	375486
			377000	376490
			378000	377493
			379000	378496
			380000	379500
			381000	380503
			382000	381506
			383000	382510
			384000	383513
			385000	384517
			386000	385520
			387000	386523
			388000	387527
			389000	388530
			390000	389533
			391000	390537
			392000	391540
			393000	392544
			394000	393547
			395000	394550
			396000	395554
			397000	396557
			398000	397560
			399000	398564
			400000	399567
			401000	400570
			402000	401574
			403000	402577
			404000	403581
			405000	404584
			406000	405587
			407000	406591
			408000	407594
			409000	408597
			410000	409601
			411000	410604
			412000	411608
			413000	412611
			414000	413614
			415000	414618
			416000	415621
			417000	416624
			418000	417628
			419000	418631
			420000	419635
			421000	420638
			422000	421641
			423000	422645
			424000	423648
			425000	424621
			426000	425549
			427000	426478
			428000	427406
			429000	428334
			430000	429262
			431000	430190
			432000	431119
			433000	432047
			434000	432975
			435000	433903
			436000	434831
			437000	435760
			438000	436688
			439000	437616
			440000	438544
			441000	439472
			442000	440400
			443000	441329
			444000	442257
			445000	443185
			446000	444113
			447000	445041
			448000	445970
			449000	446898
			450000	447826
			451000	448754
			452000	449682
			453000	450611
			454000	451539
			455000	452467
			456000	453395
			457000	454323
			458000	455252
			459000	456180
			460000	457108
			461000	458036
			462000	458964
			463000	459892
			464000	460821
			465000	461749
			466000	462677
			467000	463605
			468000	464533
			469000	465462
			470000	466390
			471000	467318
			472000	468246
			473000	469174
			474000	470103
			475000	471031
			476000	471959
			477000	472887
			478000	473815
			479000	474744
			480000	475672
			481000	476600
			482000	477528
			483000	478456
			484000	479384
			485000	480313
			486000	481241
			487000	482169
			488000	483097
			489000	484025
			490000	484954
			491000	485941
			492000	486932
			493000	487923
			494000	488914
			495000	489905
			496000	490896
			497000	491887
			498000	492878
			499000	493868
			500000	494859
			501000	495850
			502000	496841
			503000	497832
			504000	498823
			505000	499814
			506000	500805
			507000	501796
			508000	502786
			509000	503777
			510000	504768
			511000	505759
			512000	506750
			513000	507706
			514000	508662
			515000	509618
			516000	510574
			517000	511530
			518000	512486
			519000	513442
			520000	514398
			521000	515354
			522000	516310
			523000	517266
			524000	518222
			525000	519178
			526000	520134
			527000	521090
			528000	522046
			529000	523002
			530000	523958
			531000	524914
			532000	525870
			533000	526826
			534000	527837
			535000	528929
			536000	530021
			537000	531114
			538000	532206
			539000	533298
			540000	534390
			541000	535483
			542000	536575
			543000	537667
			544000	538759
			545000	539852
			546000	540944
			547000	542036
			548000	543129
			549000	544221
			550000	545313
			551000	546405
			552000	547498
			553000	548590
			554000	549682
			555000	550774
			556000	551867
			557000	552959
			558000	554051
			559000	555143
			560000	556236
			561000	557328
			562000	558420
			563000	559512
			564000	560605
			565000	561697
			566000	562789
			567000	563881
			568000	564974
			569000	566066
			570000	567158
			571000	568250
			572000	569343
			573000	570435
			574000	571527
			575000	572620
			576000	573712
			577000	574804
			578000	575896
			579000	576989
			580000	578081
			581000	579178
			582000	580288
			583000	581399
			584000	582509
			585000	583620
			586000	584731
			587000	585841
			588000	586952
			589000	588062
			590000	589173
			591000	590283
			592000	591394
			593000	592505
			594000	593615
			595000	594726
			596000	595836
			597000	596947
			598000	598057
			599000	599168
			600000	600279
			602000	602500
			604000	604721
			606000	606942
			608000	609163
			610000	611384
			612000	613606
			614000	615827
			616000	618048
			618000	620269
			620000	622490
			622000	624711
			624000	626732
			626000	628710
			628000	630688
			630000	632667
			632000	634645
			634000	636623
			636000	638601
			638000	640579
			640000	642557
			642000	644536
			644000	646514
			646000	648492
			648000	650470
			650000	652448
			652000	654426
			654000	656405
			656000	658383
			658000	660361
			660000	662339
			662000	664317
			664000	666296
			666000	668274
			668000	670252
			670000	672230
			672000	674208
			674000	676186
			676000	678165
			678000	680143
			680000	682121
			682000	684099
			684000	686077
			686000	688056
			688000	690034
			690000	692012
			692000	693990
			694000	695968
			696000	697946
			698000	699925
			700000	701903
			702000	703881
			704000	705859
			706000	707837
			708000	709815
			710000	711794
			712000	713772
			714000	715750
			716000	717220
			718000	718691
			720000	720161
			722000	721632
			724000	723102
			726000	724573
			728000	726043
			730000	727514
			732000	728984
			734000	730455
			736000	731925
			738000	733396
			740000	734866
			742000	736337
			744000	737952
			746000	740251
			748000	742550
			750000	744849
			752000	747148
			754000	749447
			756000	751746
			758000	754045
			760000	756344
			762000	758643
			764000	760942
			766000	763241
			768000	765540
			770000	767839
			772000	770137
			774000	772436
			776000	774735
			778000	777034
			780000	779333
			782000	781632
			784000	783931
			786000	786230
			788000	788529
			790000	790828
			792000	793127
			794000	795426
			796000	797725
			798000	800024
			800000	802323
